# Supplementary material for: EXPANSE: A novel narrative serious game for the behavioral assessment of cognitive abilities
Source: PLoS One. 2018 Nov 9;13(11):e0206925. doi: 10.1371/journal.pone.0206925 (PMC6226175; doi:10.1371/journal.pone.0206925)
Supplement: S1 Dataset — (XLSX) [file pone.0206925.s001.xlsx]

## Sheet: Hoja1
ATTENTION	CF	IMPULSIVIDAD COGNITIVA	IMPULSIVIDAD MOTORA	IMPULSIVIDAD NO PLANEADA	IMPUL	DOT_Aciertos promedio	DOT_Aciertos	DOT_Tiempos	GONOGO_Aciertos	GONOGO_Aciertos go	GONOGO_Aciertos nogo	GONOGO_Aciertos vertical	GONOGO_Aciertos horizontal	GONOGO_Aciertos vertical go	GONOGO_Aciertos vertical nogo	GONOGO_Aciertos horizontal go	GONOGO_Aciertos horizontal nogo	GONOGO_Tiempos Go Correcto	GONOGO_Tiempos Vertical Go Correcto	GONOGO_Tiempos Horizontal Go Correcto	STROOP_ProporcionAciertos	STROOP_ProporcionErrores	STROOP_MediaTiemposAgresion	STROOP_MediaTiemposPositivo	STROOP_MediaTiemposNegativo	STROOP_MediaTiemposNeutral	STROOP_MediaTiemposColor	STROOP_Promediotiempos	STROOP_MediaAciertosAgresion	STROOP_MediaAciertosPositivo	STROOP_MediaAciertosNegativo	STROOP_MediaAciertosNeutral	STROOP_MediaAciertosColor	STROOP_MediaTiemposAciertoAgresion	STROOP_MediaTiemposAciertoPositivo	STROOP_MediaTiemposAciertoNegativo	STROOP_MediaTiemposAciertoNeutral	STROOP_MediaTiemposAciertoColor	TMT_Tiempo A	TMT_Tiempo B	TMT_Errores A	TMT_Errores B	TORRE_TiempoTotal	Torre_Aciertos	Torre_TotalScore	TORRE_PromedioTiemposInicialAciertos	TORRE_PromedioTiemposEjecucionAciertos	TORRE_PromedioExcesoMovimiento	TORRE_SuperaMinuto
63	56	11	10	9	30	0.974684	77	0.524608	0.984	0.984	0.992	0.992	0.992	0.992	0.992	1	1	0.198463	0.156451	0.0420115	1	0	1.76437	1.74579	1.78511	1.83048	1.69344	1.76384	1	1	1	1	1	1.76437	1.74579	1.78511	1.83048	1.69344	42.637	50.6053	0	0	349.368	10	24	7.88225	30.2364	2.7	1
51	56	8	4	15	27	1	80	0.453	1	1	1	1	1	1	1	1	1	0.205406	0.163732	0.0416738	1	0	1.30893	1.26133	1.43028	1.23332	1.18491	1.28376	1	1	1	1	1	1.30893	1.26133	1.43028	1.23332	1.18491	33.6917	48.8328	0	0	222.304	10	29	13.3599	9.83344	0.4	0
49	60	10	14	17	41	0.9875	79	0.41119	0.992	0.992	1	0.992	1	0.992	1	1	1	0.195381	0.154574	0.0408064	1	0	1.195	1.3469	1.29395	1.19871	1.33517	1.27395	1	1	1	1	1	1.195	1.3469	1.29395	1.19871	1.33517	30.5994	37.4404	0	0	191.71	10	30	11.9108	8.27516	0	0
46	55	8	10	5	23	0.987342	78	0.464032	0.996	0.996	1	0.996	1	0.996	1	1	1	0.197059	0.156661	0.0403979	0.983871	0.016129	1.20312	1.35652	1.35335	1.2091	1.65509	1.35544	1	1	1	0.923077	1	1.20312	1.35652	1.35335	1.21586	1.65509	33.9077	50.2991	0	0	343.4	10	24	14.4127	21.8351	2.1	2
59	56	12	15	12	39	1	80	0.460333	0.98	0.98	1	0.98	0.992	0.988	1	0.992	1	0.21406	0.169233	0.0448272	1	0	1.38318	1.40329	1.23133	1.25471	1.4177	1.33804	1	1	1	1	1	1.38318	1.40329	1.23133	1.25471	1.4177	37.6658	55.0449	1	3	416.767	9	25	11.5064	22.9854	2	2
56	52	12	10	18	40	1	80	0.599561	0.00800002	0.00800002	0.504	0.504	0.5	0.508	0.6	0.9	0.904	0.229248	0	0.229248	1	0	1.09297	1.17441	1.20579	1.20054	1.27105	1.18895	1	1	1	1	1	1.09297	1.17441	1.20579	1.20054	1.27105	41.2754	55.8613	1	1	487.929	10	28	28.9912	23.8288	1.1	4
72	57	11	10	9	30	1	80	0.584686	0.992	0.992	1	0.992	0.996	0.996	1	0.996	1	0.24366	0.19376	0.0499002	1	0	1.21855	1.29171	1.27593	1.61378	1.32918	1.34583	1	1	1	1	1	1.21855	1.29171	1.27593	1.61378	1.32918	38.9175	53.4321	2	0	544.034	9	21	12.6423	27.9311	2.77778	1
44	41	15	19	12	46	0.9875	79	0.506046	0.984	0.984	0.992	0.992	0.984	1	0.992	0.992	1	0.208216	0.165126	0.04309	1	0	1.40995	1.06541	1.28752	1.02886	1.03681	1.16571	1	1	1	1	1	1.40995	1.06541	1.28752	1.02886	1.03681	38.9218	50.0925	1	0	251.568	10	28	4.39241	21.86	3.3	1
34	45	20	8	13	41	0.9875	79	0.390974	0.988	0.988	1	0.988	0.992	0.996	1	0.992	1	0.185443	0.14742	0.0380229	1	0	1.75304	1.66264	1.81248	1.86528	1.69521	1.75773	1	1	1	1	1	1.75304	1.66264	1.81248	1.86528	1.69521	58.6553	56.3071	0	0	269.07	10	27	5.55154	22.4431	1.2	1
62	56	10	12	15	37	1	80	0.439894	0.972	0.972	1	0.972	0.988	0.984	1	0.988	1	0.187736	0.148082	0.0396533	1	0	1.57393	1.63311	1.57511	1.69915	1.53678	1.60362	1	1	1	1	1	1.57393	1.63311	1.57511	1.69915	1.53678	45.9987	90.4513	0	0	266.872	10	28	7.08595	20.9858	1.8	1
56	56	12	14	14	40	0.975	78	0.47945	0.952	0.952	1	0.952	0.996	0.956	1	0.996	1	0.190938	0.153567	0.0373715	1	0	1.07644	1.27193	1.14776	1.33845	1.11121	1.18916	1	1	1	1	1	1.07644	1.27193	1.14776	1.33845	1.11121	37.3119	64.2929	0	0	306.552	10	23	9.88477	22.7283	2.3	2
46	57	16	17	12	45	0.9875	79	0.490012	0.984	0.984	1	0.984	0.992	0.992	1	0.992	1	0.220719	0.174588	0.0461307	0.983871	0.016129	1.28055	1.3852	1.33815	1.26845	1.21259	1.29699	1	1	1	0.916667	1	1.28055	1.3852	1.33815	1.26472	1.21259	46.5645	50.8779	0	0	231.469	10	30	10.6192	13.5194	0.4	0
69	64	7	11	11	29	0.9875	79	0.431437	0.992	0.992	0.996	0.996	1	0.992	1	1	0.996	0.190503	0.152938	0.0375642	0.967742	0.0322581	1.19817	1.23193	1.15477	1.03519	1.46446	1.2169	0.875	1	1	1	1	1.23525	1.23193	1.15477	1.03519	1.46446	30.7242	40.4943	0	0	175.545	10	26	8.78789	10.0865	0.1	0
55	56	10	9	14	33	1	80	0.586951	0.996	0.996	1	0.996	1	0.996	1	1	1	0.266373	0.212643	0.0537305	1	0	1.52612	1.3595	1.35018	1.38364	1.41883	1.40765	1	1	1	1	1	1.52612	1.3595	1.35018	1.38364	1.41883	40.5538	47.3422	2	0	313.301	10	27	12.4179	25.0738	1.8	2
47	52	8	8	20	36	1	80	0.445569	0.988	0.988	0.996	0.992	0.996	0.992	0.996	1	1	0.198847	0.157732	0.0411145	1	0	1.52398	1.54485	1.72875	1.60044	1.52581	1.58476	1	1	1	1	1	1.52398	1.54485	1.72875	1.60044	1.52581	40.1155	50.8997	0	0	262.282	10	23	8.00377	19.4267	1.8	1
51	40	14	21	29	64	0.975	78	0.463023	0.928	0.928	1	0.928	0.984	0.944	1	0.984	1	0.236438	0.186412	0.0500257	1	0	1.26525	1.32128	1.26636	1.30244	1.39826	1.31072	1	1	1	1	1	1.26525	1.32128	1.26636	1.30244	1.39826	36.8585	52.4578	1	1	288.032	10	26	13.2614	17.8574	1.4	2
57	54	18	15	9	42	1	79	0.458385	0.988	0.988	1	0.988	0.996	0.992	1	0.996	1	0.223772	0.178213	0.0455594	1	0	1.73849	1.71409	1.87503	1.57	1.68513	1.71655	1	1	1	1	1	1.73849	1.71409	1.87503	1.57	1.68513	39.4827	47.4001	0	0	190.85	10	30	7.89453	13.845	1.2	0
56	54	17	21	14	52	0.975	78	0.527131	0.992	0.992	0.996	0.996	0.996	0.996	0.996	1	1	0.215623	0.171992	0.0436311	1	0	1.61618	1.6475	1.57967	1.53037	1.58484	1.59171	1	1	1	1	1	1.61618	1.6475	1.57967	1.53037	1.58484	43.9404	63.4922	0	0	375.885	10	26	15.0642	24.6452	1.3	1
57	61	14	17	15	46	1	80	0.465659	0.984	0.984	0.992	0.992	0.996	0.988	0.996	1	0.996	0.210515	0.167218	0.0432968	0.951613	0.0483871	1.30894	1.17403	1.37693	1.34935	1.3125	1.30435	1	0.875	1	0.9375	1	1.30894	1.1803	1.37693	1.29619	1.3125	31.5652	43.6665	0	0	281.648	10	24	7.57965	21.5252	3.1	1
48	61	17	10	10	37	1	80	0.450397	0.988	0.988	1	0.988	0.996	0.992	1	0.996	1	0.191852	0.15117	0.040682	0.983871	0.016129	1.06868	1.14687	1.36075	1.08285	1.22895	1.17762	0.923077	1	1	1	1	1.08728	1.14687	1.36075	1.08285	1.22895	38.8074	46.7775	0	1	185.046	10	25	6.08761	14.6168	1.5	0
52	41	23	19	16	58	1	80	0.511933	1	1	1	1	1	1	1	1	1	0.249387	0.197863	0.0515234	1	0	1.34186	1.27384	1.33135	1.41867	1.21594	1.31633	1	1	1	1	1	1.34186	1.27384	1.33135	1.41867	1.21594	47.7993	46.8655	0	0	177.503	10	30	6.87443	12.0422	0.7	0
55	52	14	17	20	51	0.961039	74	0.558047	0.956	0.956	0.984	0.972	0.98	0.976	0.988	0.992	0.996	0.232898	0.185821	0.0470773	1	0	1.28029	1.28597	1.58231	1.28781	2.05747	1.49877	1	1	1	1	1	1.28029	1.28597	1.58231	1.28781	2.05747	29.4826	34.6671	0	0	824.62	10	24	7.93861	20.3699	2.2	0
53	52	13	10	8	31	0.9875	79	0.448163	0.984	0.984	1	0.984	1	0.984	1	1	1	0.20668	0.164555	0.0421252	1	0	1.46214	1.27779	1.5295	1.42237	1.29113	1.39658	1	1	1	1	1	1.46214	1.27779	1.5295	1.42237	1.29113	35.873	55.5583	0	1	268.469	10	24	7.41852	22.0093	3.2	1
70	60	16	17	17	50	1	79	0.4554	0.988	0.988	0.996	0.992	0.996	0.992	0.996	1	1	0.208518	0.992	0.992	0.967742	0.0322581	1.24121	1.37964	1.5159	1.27708	1.59297	1.40136	1	0.875	1	1	1	1.24121	1.36691	1.5159	1.27708	1.59297	25.4841	35.3096	0	1	247.515	10	25	5.31557	21.7931	3.2	1
45	43	16	14	32	62	0.9875	79	0.404051	0.912	0.912	0.928	0.984	0.944	0.968	0.944	1	0.984	0.207027	0.165789	0.0412379	1	0	1.74168	1.31972	2.54255	1.52332	1.81328	1.78811	1	1	1	1	1	1.74168	1.31972	2.54255	1.52332	1.81328	28.0812	48.6599	0	0	213.006	10	23	8.09073	15.1451	2	0
65	62	9	7	2	18	0.934211	71	0.504102	0.98	0.98	0.992	0.988	0.984	0.996	0.992	0.992	1	0.2103	0.167096	0.0432039	1	0	1.60356	1.48199	1.50536	1.66028	1.58388	1.56702	1	1	1	1	1	1.60356	1.48199	1.50536	1.66028	1.58388	35.3013	57.6062	0	1	315.719	10	29	5.97394	27.3816	4.5	2
49	49	18	10	23	51	0.975	78	0.399931	0.988	0.988	0.996	0.992	0.992	0.996	0.996	0.996	1	0.199673	0.159037	0.0406361	0.983871	0.016129	1.18857	1.04025	1.31427	1.23523	1.26189	1.20804	1	1	1	1	0.9	1.18857	1.04025	1.31427	1.23523	1.31091	27.0793	82.2493	0	5	197.651	10	25	5.64642	16.6432	1.8	0
76	63	10	13	19	42	0.9875	79	0.487551	0.988	0.988	1	0.988	1	0.988	1	1	1	0.2222	0.178572	0.0436286	1	0	1.3642	1.36087	1.51299	1.3458	1.48008	1.41279	1	1	1	1	1	1.3642	1.36087	1.51299	1.3458	1.48008	33.2623	51.0685	0	0	290.401	10	28	14.5099	16.3631	0.7	0
44	47	11	6	6	23	1	80	0.47175	0.988	0.988	0.996	0.992	0.992	0.996	0.996	0.996	1	0.197666	0.157796	0.03987	0.983871	0.016129	1.028	1.18045	1.12183	1.13255	1.11704	1.11597	0.9	1	1	1	1	1.04839	1.18045	1.12183	1.13255	1.11704	30.3547	49.5676	0	1	273.909	10	24	7.63705	27.1651	1.4	2
57	44	17	10	20	47	0.9375	75	0.409205	0.988	0.988	1	0.988	1	0.988	1	1	1	0.181835	0.145959	0.0358759	1	0	1.16021	1.09234	1.18068	1.06209	1.2111	1.14129	1	1	1	1	1	1.16021	1.09234	1.18068	1.06209	1.2111	30.5147	38.433	0	1	294.15	10	25	9.31913	22.2644	2	1
72	72	11	19	5	35	0.9375	75	0.481357	0.996	0.996	1	0.996	0.996	1	1	0.996	1	0.199723	0.157507	0.0422157	0.983871	0.016129	1.47269	2.7438	1.39587	1.42569	1.3879	1.68519	0.944444	1	1	1	1	1.42427	2.7438	1.39587	1.42569	1.3879	35.3384	43.6185	0	0	285.848	10	25	5.68021	30.7637	4.8	2
51	62	15	14	10	39	0.9875	79	0.389185	0.996	0.996	0.996	1	0.996	1	0.996	1	1	0.179186	0.14355	0.0356367	1	0	1.06151	1.052	1.09516	1.03833	1.1981	1.08902	1	1	1	1	1	1.06151	1.052	1.09516	1.03833	1.1981	25.5979	47.377	0	2	317.577	10	22	15.4303	18.2912	0.9	2
52	54	19	11	17	47	1	80	0.433447	1	1	1	1	1	1	1	1	1	0.21158	0.168888	0.0426914	1	0	1.30459	1.08875	1.24728	1.24741	1.2381	1.22523	1	1	1	1	1	1.30459	1.08875	1.24728	1.24741	1.2381	32.1735	42.6343	0	0	235.862	10	27	9.76961	15.1263	1	0
72	62	13	22	20	55	0.975	78	0.404954	0.988	0.988	1	0.988	1	0.988	1	1	1	0.181743	0.144689	0.037054	1	0	1.25681	1.23001	1.18367	1.1555	1.23438	1.21207	1	1	1	1	1	1.25681	1.23001	1.18367	1.1555	1.23438	44.5645	78.28	1	4	296.916	10	25	5.97004	24.9337	2.4	1
62	58	14	11	11	36	0.833333	40	0.50708	0.98	0.98	0.996	0.984	0.996	0.984	1	0.996	0.996	0.222328	0.179604	0.0427236	1	0	1.23732	1.10443	1.18238	1.14914	1.09174	1.153	1	1	1	1	1	1.23732	1.10443	1.18238	1.14914	1.09174	33.5811	48.3486	0	1	300.692	10	28	11.8179	19.7212	1.1	1
55	59	10	10	10	30	0.9875	79	0.452788	0.988	0.988	1	0.988	1	0.988	1	1	1	0.199138	0.158912	0.0402259	1	0	1.31813	1.2348	1.2074	1.25661	1.17445	1.23828	1	1	1	1	1	1.31813	1.2348	1.2074	1.25661	1.17445	33.9958	76.2502	0	5	212.189	10	28	8.24391	14.3663	2.2	0
41	58	22	16	30	68	0.975	78	0.428905	0.992	0.992	1	0.992	0.996	0.996	1	0.996	1	0.187264	0.150361	0.0369031	1	0	1.24708	1.15885	1.2135	1.32544	1.34583	1.25814	1	1	1	1	1	1.24708	1.15885	1.2135	1.32544	1.34583	32.1902	32.8918	0	0	256.147	10	26	7.18006	18.4201	1.1	1
62	58	14	14	16	44	0.9875	79	0.476966	0.984	0.984	1	0.984	0.996	0.988	1	0.996	1	0.20706	0.165713	0.0413471	0.983871	0.016129	0.99338	1.00486	0.958325	0.872303	1.12652	0.991079	1	0.875	1	1	1	0.99338	0.926588	0.958325	0.872303	1.12652	40.7105	71.6125	0	0	412.237	10	26	22.5294	18.6784	1.1	3
73	66	8	16	7	31	1	79	0.456787	0.988	0.988	1	0.988	0.992	0.996	1	0.992	1	0.209326	0.166153	0.0431734	1	0	1.11326	1.1097	1.15942	1.11182	0.991494	1.09714	1	1	1	1	1	1.11326	1.1097	1.15942	1.11182	0.991494	42.9456	41.2805	0	0	771.208	8	23	13.8616	46.872	3.875	3
46	57	14	21	4	39	0.9625	77	0.4167	0.996	0.996	1	0.996	0.996	1	1	0.996	1	0.188404	0.148036	0.0403675	1	0	1.71218	1.87162	1.78419	1.69805	2.03985	1.82118	1	1	1	1	1	1.71218	1.87162	1.78419	1.69805	2.03985	59.3635	52.9688	1	0	420.396	10	25	15.9789	27.7228	1.3	3
59	54	9	15	20	44	0.987342	78	0.523475	0.996	0.996	1	0.996	1	0.996	1	1	1	0.227484	0.180508	0.046976	1	0	2.32497	2.41931	2.5241	2.50073	2.49908	2.45364	1	1	1	1	1	2.32497	2.41931	2.5241	2.50073	2.49908	57.7446	92.0324	1	0	353.312	10	30	9.01232	28.0259	2.2	1
62	60	6	2	10	18	0.9875	79	0.381131	1	1	1	1	1	1	1	1	1	0.191317	0.152049	0.0392683	1	0	1.14352	1.11386	1.03522	1.1364	1.05624	1.09705	1	1	1	1	1	1.14352	1.11386	1.03522	1.1364	1.05624	32.6567	58.3882	0	0	393.044	10	29	28.086	13.4427	0.5	2
48	58	11	28	15	54	0.9875	79	0.465991	0.996	0.996	1	0.996	0.996	1	1	0.996	1	0.217015	0.172201	0.044814	1	0	1.53598	1.52607	1.30562	1.48028	1.4765	1.46489	1	1	1	1	1	1.53598	1.52607	1.30562	1.48028	1.4765	48.4835	73.2051	0	3	347.007	10	26	14.5916	23.3712	0.7	2
60	58	15	14	32	61	1	80	0.448422	1	1	1	1	1	1	1	1	1	0.214833	0.170338	0.0444951	0.983871	0.016129	1.42808	1.25281	1.24471	1.07369	1.42623	1.2851	1	0.916667	1	1	1	1.42808	1.26159	1.24471	1.07369	1.42623	34.2996	60.3022	0	1	404.018	9	21	13.5526	18.2137	0.888889	0
60	59	15	6	16	37	1	80	0.400754	0.996	0.996	1	0.996	0.996	1	1	0.996	1	0.183565	0.146991	0.0365733	0.983871	0.016129	1.88082	1.49154	1.50892	1.90934	1.53142	1.66441	0.928571	1	1	1	1	1.92944	1.49154	1.50892	1.90934	1.53142	41.9792	49.6816	0	0	322.986	10	26	8.48356	25.5723	0.9	1
48	51	11	10	22	43	0.971831	69	0.466218	0.00800002	0.00800002	0.508	0.5	0.504	0.504	0.604	0.9	0.904	0.209351	0.192505	0.0168457	1	0	1.26292	1.16778	1.16423	1.20699	1.32049	1.22448	1	1	1	1	1	1.26292	1.16778	1.16423	1.20699	1.32049	41.9961	77.374	0	5	330.518	10	18	10.1686	24.9666	2.8	1
47	46	14	28	22	64	1	76	0.441973	0.98	0.98	0.984	0.996	0.996	0.984	0.996	1	0.988	0.177497	0.144534	0.0329627	1	0	1.21971	1.0623	1.08027	1.09676	1.3248	1.15677	1	1	1	1	1	1.21971	1.0623	1.08027	1.09676	1.3248	32.9741	50.2715	0	0	259.924	10	28	9.34383	19.8443	1.2	1
58	58	15	13	15	43	1	80	0.511203	0.988	0.988	1	0.988	0.988	1	1	0.988	1	0.212159	0.168499	0.0436607	0.983871	0.016129	1.90204	1.61493	1.6744	1.8884	1.54135	1.72422	1	1	1	1	0.9375	1.90204	1.61493	1.6744	1.8884	1.55237	36.5302	66.581	0	3	345.804	10	26	12.6137	24.0291	1.1	1
56	61	15	13	16	44	0.974684	77	0.667667	0.936	0.936	0.992	0.944	0.988	0.948	0.992	0.996	1	0.270913	0.215905	0.0550078	0.983871	0.016129	1.47851	1.08206	1.37692	1.17214	1.15708	1.25334	1	0.923077	1	1	1	1.47851	1.07051	1.37692	1.17214	1.15708	36.801	50.2954	0	0	363.192	10	27	7.54482	30.4309	4	2
71	62	15	22	14	51	0.9875	79	0.503084	0.988	0.988	1	0.988	1	0.988	1	1	1	0.221587	0.175961	0.0456256	0.951613	0.0483871	1.20566	1.04178	0.892334	0.889567	0.891027	0.984075	1	0.928571	0.916667	0.888889	1	1.20566	1.06851	0.896884	0.885254	0.891027	31.8432	40.7145	0	1	210.301	10	30	12.4277	9.7956	1.2	0
64	54	10	10	9	29	0.9875	79	0.480146	1	1	1	1	1	1	1	1	1	0.220055	0.175846	0.044209	1	0	1.3395	1.33991	1.2125	1.31269	1.22844	1.28661	1	1	1	1	1	1.3395	1.33991	1.2125	1.31269	1.22844	50.3174	64.5365	0	2	277.346	10	26	11.8019	17.3259	0.6	0
61	57	10	17	15	42	1	79	0.482227	0.932	0.932	0.968	0.964	0.964	0.968	0.972	0.992	0.996	0.185204	0.146718	0.0384859	1	0	1.74803	1.71657	1.64821	2.03993	1.69084	1.76872	1	1	1	1	1	1.74803	1.71657	1.64821	2.03993	1.69084	37.3911	58.559	0	4	240.767	10	29	10.2456	15.7161	0.8	0
47	48	16	16	16	48	1	80	0.518716	0.992	0.992	1	0.992	0.996	0.996	1	0.996	1	0.218647	0.174699	0.0439473	0.983871	0.016129	1.39301	1.37199	1.37937	1.34773	1.40888	1.38019	1	1	1	1	0.923077	1.39301	1.37199	1.37937	1.34773	1.39616	45.8939	59.9639	0	1	286.221	10	28	9.84143	20.0785	0.4	0
70	63	8	9	9	26	0.9875	79	0.543565	0.996	0.996	0.996	1	0.996	1	0.996	1	1	0.205309	0.162897	0.0424124	1	0	1.25117	1.25795	1.20741	1.29287	1.27026	1.25593	1	1	1	1	1	1.25117	1.25795	1.20741	1.29287	1.27026	34.3592	43.3146	0	0	213.249	10	26	9.66871	12.7873	0.5	0
59	59	8	15	13	36	1	78	0.597836	1	1	1	1	1	1	1	1	1	0.229154	0.18458	0.0445742	1	0	1.61806	1.53767	1.37739	1.46688	1.3544	1.47088	1	1	1	1	1	1.61806	1.53767	1.37739	1.46688	1.3544	37.8167	51.2249	0	0	341.307	10	24	9.68651	27.3676	2	1
58	51	13	12	17	42	0.9625	77	0.444191	0.984	0.984	1	0.984	1	0.984	1	1	1	0.203766	0.163961	0.0398048	1	0	1.05518	1.02585	0.986165	1.0106	1.10057	1.03567	1	1	1	1	1	1.05518	1.02585	0.986165	1.0106	1.10057	37.4951	54.6802	0	2	342.25	10	21	8.4352	23.5584	1.8	1
61	59	11	13	9	33	0.9875	79	0.606591	0.992	0.992	1	0.992	1	0.992	1	1	1	0.295091	0.234834	0.0602565	1	0	1.24741	1.41968	1.27588	1.34777	1.32088	1.32233	1	1	1	1	1	1.24741	1.41968	1.27588	1.34777	1.32088	36.188	49.1902	1	2	360.13	10	27	14.0672	24.6514	1.7	2
48	43	16	16	12	44	1	80	0.511874	0.992	0.992	1	0.992	1	0.992	1	1	1	0.214072	0.168693	0.0453785	1	0	1.29892	1.38696	1.29095	1.496	1.39684	1.37393	1	1	1	1	1	1.29892	1.38696	1.29095	1.496	1.39684	27.7374	50.0848	0	1	184.773	10	25	7.78734	11.4997	0.6	0
63	57	9	14	10	33	1	80	0.584013	1	1	1	1	1	1	1	1	1	0.23401	0.186867	0.0471426	1	0	1.77957	1.69124	1.7642	1.71584	1.76562	1.74329	1	1	1	1	1	1.77957	1.69124	1.7642	1.71584	1.76562	44.795	57.9426	0	0	326.374	10	29	15.1445	18.4971	1.6	2
54	60	13	15	9	37	0.9125	73	0.429714	0.96	0.96	0.992	0.968	0.988	0.972	0.992	0.996	1	0.188612	0.14954	0.0390727	1	0	1.19794	1.0385	1.09782	1.21191	1.08805	1.12685	1	1	1	1	1	1.19794	1.0385	1.09782	1.21191	1.08805	25.5742	35.6691	0	0	213.698	10	22	4.24277	18.192	3.2	0
49	48	16	29	22	67	0.9875	79	0.371249	0.996	0.996	1	0.996	1	0.996	1	1	1	0.175475	0.141026	0.034449	1	0	1.6143	1.53942	1.5012	1.63015	1.69912	1.59684	1	1	1	1	1	1.6143	1.53942	1.5012	1.63015	1.69912	42.5437	53.4033	0	0	274.275	10	30	3.94814	23.474	2.2	0
52	54	18	16	14	48	0.974684	77	0.545436	0.996	0.996	1	0.996	1	0.996	1	1	1	0.220621	0.176441	0.0441801	1	0	1.71783	1.65274	1.95729	2.07272	1.92013	1.86414	1	1	1	1	1	1.71783	1.65274	1.95729	2.07272	1.92013	44.899	64.7299	1	2	214.129	10	26	5.25681	17.3901	1.6	0
68	65	11	14	17	42	0.987179	77	0.469796	0.988	0.988	0.996	0.992	0.996	0.992	0.996	1	1	0.227324	0.180177	0.0471467	0.951613	0.0483871	2.07766	1.71975	1.91498	2.03168	1.71493	1.8918	1	1	0.8	0.941176	1	2.07766	1.71975	1.86983	2.05473	1.71493	46.5598	62.095	0	0	307.529	10	26	8.21548	26.1755	2	1
65	60	9	17	11	37	0.974684	77	0.431518	0.964	0.964	0.976	0.988	0.972	0.992	0.976	0.996	1	0.238384	0.189256	0.0491275	1	0	1.72783	1.56086	1.3936	1.35891	1.7797	1.56418	1	1	1	1	1	1.72783	1.56086	1.3936	1.35891	1.7797	58.2681	97.938	1	5	333.465	10	26	13.0549	22.1328	1.5	1
66	58	7	9	10	26	0.975	78	0.478985	0.976	0.976	1	0.976	1	0.976	1	1	1	0.211071	0.168301	0.0427701	1	0	1.02135	1.23236	1.30896	1.04576	1.23004	1.16769	1	1	1	1	1	1.02135	1.23236	1.30896	1.04576	1.23004	47.866	68.8212	1	1	220.191	10	23	6.47918	18.695	2.8	0
61	62	18	15	17	50	1	79	0.741304	0.972	0.972	0.984	0.988	0.988	0.984	0.988	1	0.996	0.331134	0.266252	0.0648821	1	0	1.74939	2.064	1.51278	1.46748	1.55798	1.67033	1	1	1	1	1	1.74939	2.064	1.51278	1.46748	1.55798	42.1265	42.3599	4	0	343.491	10	25	14.2155	22.5353	0.7	1
59	60	11	14	22	47	0.9875	79	0.465462	1	1	1	1	1	1	1	1	1	0.229891	0.182686	0.0472051	0.983871	0.016129	1.33615	1.40756	1.31128	2.21635	1.42253	1.53878	1	1	1	1	0.933333	1.33615	1.40756	1.31128	2.21635	1.4255	34.0315	54.2873	0	0	280.996	10	28	11.7254	20.3652	1.4	1
53	58	11	20	15	46	1	80	0.516299	1	1	1	1	1	1	1	1	1	0.216429	0.173569	0.0428594	1	0	1.58419	1.57518	1.6285	1.64919	1.54513	1.59644	1	1	1	1	1	1.58419	1.57518	1.6285	1.64919	1.54513	48.541	55.6719	0	0	372.082	10	29	8.49761	30.7458	4.2	3
47	52	12	14	15	41	1	80	0.461188	0.00800002	0.00800002	0.508	0.5	0.508	0.5	0.608	0.9	0.9	0.409485	0.409485	0	1	0	1.32516	1.20363	1.29827	1.15828	1.29384	1.25584	1	1	1	1	1	1.32516	1.20363	1.29827	1.15828	1.29384	33.4553	53.7538	0	4	254.407	10	26	8.05302	18.6691	0.9	1
52	59	12	20	10	42	1	80	0.455586	1	1	1	1	1	1	1	1	1	0.188274	0.149147	0.0391271	1	0	1.2255	1.11491	1.12366	1.36033	1.0919	1.18326	1	1	1	1	1	1.2255	1.11491	1.12366	1.36033	1.0919	42.9296	53.3676	0	0	311.714	10	26	11.3754	21.0283	1.1	1
71	60	8	5	12	25	0.9875	79	0.405793	0.996	0.996	1	0.996	1	0.996	1	1	1	0.217575	0.174692	0.0428831	1	0	1.88124	1.86361	1.8036	1.8801	1.82478	1.85067	1	1	1	1	1	1.88124	1.86361	1.8036	1.8801	1.82478	42.6345	66.0952	0	0	290.602	10	29	12.9823	17.9141	0.3	1
66	44	10	14	16	40	1	79	0.506382	0.992	0.992	0.996	0.996	1	0.992	1	1	0.996	0.218019	0.173775	0.0442436	1	0	2.07366	2.06364	1.93502	1.95299	1.9172	1.9885	1	1	1	1	1	2.07366	2.06364	1.93502	1.95299	1.9172	45.5781	59.3013	0	0	457.233	9	24	12.8732	23.3321	0.555556	1
51	45	16	25	21	62	0.9875	79	0.430605	0.964	0.964	0.996	0.968	0.992	0.972	0.996	0.996	1	0.197776	0.158831	0.038945	0.983871	0.016129	1.47158	1.37402	1.49797	1.39202	1.41384	1.42989	1	1	1	1	0.909091	1.47158	1.37402	1.49797	1.39202	1.44043	33.6218	36.951	0	0	199.679	10	26	6.32883	14.8522	0.9	0
50	59	8	10	12	30	0.987179	77	0.509569	0.988	0.988	1	0.988	0.988	1	1	0.988	1	0.21513	0.17136	0.0437697	1	0	1.53576	1.56109	1.3969	1.49699	1.45355	1.48886	1	1	1	1	1	1.53576	1.56109	1.3969	1.49699	1.45355	46.6681	73.0474	0	0	427.117	10	28	11.1291	33.7913	1.2	3
57	55	12	19	16	47	1	80	0.448822	1	1	1	1	1	1	1	1	1	0.196672	0.156575	0.0400972	1	0	1.57743	1.66272	1.77724	2.11683	1.59054	1.74495	1	1	1	1	1	1.57743	1.66272	1.77724	2.11683	1.59054	53.761	53.261	2	0	402.905	9	23	9.62644	21.791	2	1
63	51	13	12	23	48	0.9625	77	0.35714	0.98	0.98	1	0.98	0.992	0.988	1	0.992	1	0.178219	0.141131	0.0370883	0.983871	0.016129	0.995383	0.925855	1.03203	1.26474	1.09781	1.06316	1	0.9	1	1	1	0.995383	0.873847	1.03203	1.26474	1.09781	30.0568	36.6727	0	0	300.796	10	29	13.214	17.6548	1.9	1
51	60	14	8	18	40	1	78	0.597315	0.972	0.972	0.976	0.996	0.98	0.992	0.98	1	0.996	0.252331	0.202532	0.0497989	1	0	1.87763	1.90669	1.8102	1.93001	1.5942	1.82375	1	1	1	1	1	1.87763	1.90669	1.8102	1.93001	1.5942	62.1176	87.1447	0	2	404.258	10	27	13.4469	29.7089	1.2	2
46	48	18	28	23	69	0.975	78	0.476154	0.996	0.996	1	0.996	0.996	1	1	0.996	1	0.220857	0.177787	0.0430693	0.983871	0.016129	1.00452	0.900825	1.09215	1.05894	1.13363	1.03801	1	1	1	0.928571	1	1.00452	0.900825	1.09215	1.04241	1.13363	28.772	40.439	0	0	323.533	10	26	7.13306	26.7731	4.2	1
63	52	12	20	17	49	1	80	0.44657	0.996	0.996	1	0.996	1	0.996	1	1	1	0.189699	0.151483	0.038216	1	0	1.36085	1.37235	1.30469	1.40839	1.40898	1.37105	1	1	1	1	1	1.36085	1.37235	1.30469	1.40839	1.40898	37.1133	50.4143	0	0	306.754	10	30	10.4187	24.6784	4.6	1
54	48	12	6	21	39	1	77	0.495105	0.996	0.996	1	0.996	1	0.996	1	1	1	0.219739	0.175808	0.0439316	1	0	1.43392	1.30972	1.39859	1.28809	1.35345	1.35675	1	1	1	1	1	1.43392	1.30972	1.39859	1.28809	1.35345	36.2947	54.5996	1	0	544.291	8	24	14.2258	18.9241	1	1
72	56	9	5	9	23	0.975	78	0.461113	0.984	0.984	1	0.984	0.992	0.992	1	0.992	1	0.200995	0.158911	0.042084	1	0	1.49394	1.32397	1.36373	1.24365	1.34961	1.35498	1	1	1	1	1	1.49394	1.32397	1.36373	1.24365	1.34961	44.6479	53.4153	0	0	407.743	9	25	14.4906	17.4624	0.444444	1
57	58	19	10	9	38	0.974359	76	0.540408	0.988	0.988	1	0.988	1	0.988	1	1	1	0.222515	0.17744	0.0450751	0.983871	0.016129	1.25269	1.16954	1.23806	1.20816	1.16575	1.20684	1	1	0.923077	1	1	1.25269	1.16954	1.23503	1.20816	1.16575	51.1973	49.348	0	0	493.081	9	27	24.7303	13.6754	0	2
49	42	17	7	18	42	1	80	0.351132	0.972112	0.972112	1	0.972112	0.992032	0.98008	1	0.992032	1	0.189426	0.150819	0.0386072	0.983871	0.016129	2.02213	1.41272	1.48535	1.51899	1.68444	1.62473	1	1	1	0.923077	1	2.02213	1.41272	1.48535	1.46702	1.68444	43.8785	72.738	0	1	387.826	9	19	9.56479	20.1744	1	0
60	57	7	4	12	23	1	80	0.488666	1	1	1	1	1	1	1	1	1	0.247791	0.197578	0.0502126	1	0	1.39305	1.58871	1.45185	1.42729	1.53337	1.47885	1	1	1	1	1	1.39305	1.58871	1.45185	1.42729	1.53337	45.3126	61.1962	0	0	392.371	10	26	15.2148	30.1972	2.2	3
63	59	20	26	18	64	0.9375	75	0.39784	0.984	0.984	1	0.984	0.996	0.988	1	0.996	1	0.209458	0.164177	0.0452804	1	0	1.13971	1.18788	1.06529	0.971931	1.06402	1.08577	1	1	1	1	1	1.13971	1.18788	1.06529	0.971931	1.06402	30.5648	32.6499	0	0	400.597	10	26	22.9611	18.4752	1	2
47	49	16	19	20	55	1	80	0.45023	1	1	1	1	1	1	1	1	1	0.203037	0.16151	0.0415266	1	0	1.07975	1.07377	1.00567	1.07096	0.894427	1.02492	1	1	1	1	1	1.07975	1.07377	1.00567	1.07096	0.894427	21.8	57.2226	0	0	235.797	10	29	13.6734	10.7782	0.5	0
64	62	16	5	14	35	0.9875	79	0.452858	0.992	0.992	1	0.992	1	0.992	1	1	1	0.199755	0.160299	0.0394563	0.967742	0.0322581	0.957886	0.959753	0.989111	1.06294	1.00634	0.995206	1	0.8	1	1	1	0.957886	0.92128	0.989111	1.06294	1.00634	31.0108	41.0657	0	1	378.245	10	26	21.1363	19.1197	1.4	3
79	70	8	8	26	42	1	79	0.514373	0.976	0.976	1	0.976	0.996	0.98	1	0.996	1	0.194468	0.154135	0.040333	0.983871	0.016129	1.15063	1.07949	1.10372	1.09288	1.07583	1.10051	1	0.916667	1	1	1	1.15063	1.07109	1.10372	1.09288	1.07583	40.7085	40.4293	3	0	354.811	10	26	14.7259	22.1338	1.6	2
66	53	10	8	14	32	0.9875	79	0.487734	0.984064	0.984064	1	0.984064	0.984064	1	1	0.984064	1	0.265951	0.211076	0.0548753	1	0	1.8445	2.01296	1.8891	1.81921	2.10195	1.93354	1	1	1	1	1	1.8445	2.01296	1.8891	1.81921	2.10195	78.0688	77.7705	0	0	1081.21	9	23	13.2946	48.9682	3.88889	3
48	43	7	11	7	25	1	77	0.652382	0.992	0.992	1	0.992	1	0.992	1	1	1	0.229556	0.18362	0.0459358	1	0	1.98475	1.68196	1.70696	1.56292	1.74519	1.73636	1	1	1	1	1	1.98475	1.68196	1.70696	1.56292	1.74519	42.1653	52.6836	0	0	413.787	10	26	14.1666	27.195	0.9	2
57	58	15	7	9	31	1	80	0.505219	0.988	0.988	1	0.988	0.996	0.992	1	0.996	1	0.242047	0.193245	0.0488024	1	0	1.95063	1.9544	1.8902	1.8193	1.82978	1.88886	1	1	1	1	1	1.95063	1.9544	1.8902	1.8193	1.82978	48.3826	93.5371	0	1	478.945	9	24	8.38935	15.9757	0.888889	0
56	51	20	16	22	58	1	79	0.605243	0.996	0.996	1	0.996	0.996	1	1	0.996	1	0.231578	0.183097	0.048481	1	0	1.24922	1.15714	1.0813	1.06707	1.23891	1.15873	1	1	1	1	1	1.24922	1.15714	1.0813	1.06707	1.23891	33.5096	38.5839	0	0	269.299	10	21	11.3778	20.1649	1.6	0
65	63	13	14	11	38	0.9875	79	0.435746	0.972	0.972	0.992	0.98	0.988	0.984	0.992	0.996	1	0.211312	0.168878	0.0424343	1	0	2.20599	2.35456	2.19686	2.43652	2.18298	2.27538	1	1	1	1	1	2.20599	2.35456	2.19686	2.43652	2.18298	66.3528	73.3696	0	0	537.782	10	27	22.4655	31.296	1.6	4
49	50	13	21	18	52	0.987179	77	0.509425	0.952	0.952	0.968	0.984	0.98	0.972	0.984	0.996	0.984	0.242177	0.196706	0.0454712	1	0	1.30884	1.36598	1.45342	1.57317	1.33856	1.40799	1	1	1	1	1	1.30884	1.36598	1.45342	1.57317	1.33856	45.6318	91.2844	0	3	177.791	10	30	7.00163	11.6648	0.2	0
54	55	11	3	13	27	0.975	78	0.515087	0.964	0.964	0.992	0.972	0.984	0.98	0.996	0.988	0.996	0.206243	0.165268	0.0409751	1	0	1.33374	1.65405	1.63897	1.36276	1.42809	1.48352	1	1	1	1	1	1.33374	1.65405	1.63897	1.36276	1.42809	38.1017	54.8563	0	0	333.402	10	30	7.62849	27.6481	3.4	1
53	50	16	8	21	45	0.462687	31	0.498115	0.964	0.964	0.972	0.992	0.98	0.984	0.98	1	0.992	0.251139	0.200504	0.0506344	1	0	1.64514	1.54736	1.57086	1.50045	1.40934	1.53463	1	1	1	1	1	1.64514	1.54736	1.57086	1.50045	1.40934	40.9405	99.2533	0	3	628.351	9	21	20.6485	46.2791	6.77778	5
49	59	25	26	20	71	1	80	0.388193	0.992	0.992	1	0.992	1	0.992	1	1	1	0.195061	0.155869	0.0391926	0.983871	0.016129	1.40052	1.39795	1.43592	1.35003	1.35834	1.38855	1	1	1	0.928571	1	1.40052	1.39795	1.43592	1.35151	1.35834	41.5623	56.1128	0	0	298.195	10	28	11.6458	19.9918	0.8	0
54	47	16	14	14	44	0.9875	79	0.442003	1	1	1	1	1	1	1	1	1	0.221073	0.176767	0.0443066	1	0	1.46107	1.45093	1.56673	1.31139	1.33635	1.42529	1	1	1	1	1	1.46107	1.45093	1.56673	1.31139	1.33635	59.9378	61.911	0	0	264.799	10	28	16.2556	12.2223	0.4	1
61	49	11	3	18	32	1	79	0.453578	0.992	0.992	0.996	0.996	0.996	0.996	0.996	1	1	0.206402	0.164029	0.0423732	1	0	1.24023	1.34825	1.34674	1.38851	1.24077	1.3129	1	1	1	1	1	1.24023	1.34825	1.34674	1.38851	1.24077	32.0603	59.524	0	1	303.972	10	30	7.87451	23.6455	3.4	1
45	54	16	20	17	53	1	80	0.40491	0.988	0.988	1	0.988	0.996	0.992	1	0.996	1	0.193869	0.155129	0.0387403	0.983871	0.016129	1.0823	1.17224	1.44395	1.35956	1.16664	1.24494	1	1	1	1	0.923077	1.0823	1.17224	1.44395	1.35956	1.18783	28.2107	40.2649	0	1	275.302	10	30	11.9488	16.7994	1.5	1
71	52	5	10	8	23	1	79	0.47583	0.996	0.996	1	0.996	1	0.996	1	1	1	0.226134	0.180261	0.0458731	1	0	1.53228	1.43761	1.64145	1.36133	1.71016	1.53656	1	1	1	1	1	1.53228	1.43761	1.64145	1.36133	1.71016	36.056	39.4235	0	0	276.619	10	29	9.70512	19.633	1.5	0
67	57	8	16	12	36	0.9875	79	0.451648	0.984	0.984	1	0.984	0.992	0.992	1	0.992	1	0.18461	0.144146	0.0404636	1	0	1.42193	1.42798	1.60238	1.69287	1.44453	1.51794	1	1	1	1	1	1.42193	1.42798	1.60238	1.69287	1.44453	40.4594	54.0309	1	2	344.095	10	29	8.1009	26.2905	2.9	1
62	56	10	10	9	29	1	80	0.527148	0.98	0.98	0.992	0.988	0.988	0.992	0.992	0.996	1	0.206687	0.161884	0.044803	1	0	1.36311	1.2762	1.52303	1.19351	1.56099	1.38337	1	1	1	1	1	1.36311	1.2762	1.52303	1.19351	1.56099	31.9737	47.6495	0	0	242.611	10	28	8.41252	16.9431	0.8	0
49	46	16	17	16	49	1	80	0.61227	0.992	0.992	0.992	1	0.992	1	0.992	1	1	0.223503	0.17832	0.0451825	1	0	1.45122	1.31911	1.38791	1.29467	1.44148	1.37888	1	1	1	1	1	1.45122	1.31911	1.38791	1.29467	1.44148	41.8051	49.4124	2	0	236.397	10	30	7.00504	17.8238	1.1	0
58	60	4	5	11	20	1	80	0.58013	1	1	1	1	1	1	1	1	1	0.213246	0.169647	0.0435986	1	0	1.20945	1.37462	1.23849	1.34799	1.30115	1.29434	1	1	1	1	1	1.20945	1.37462	1.23849	1.34799	1.30115	34.1118	42.2102	0	0	276.363	10	21	8.64323	24.5657	2.3	0
69	55	7	11	10	28	1	80	0.4516	1	1	1	1	1	1	1	1	1	0.208123	0.164064	0.0440591	0.983871	0.016129	1.15383	1.14734	1.15398	1.05864	1.22794	1.14835	1	1	1	0.916667	1	1.15383	1.14734	1.15398	1.08394	1.22794	26.98	40.9833	0	0	317.521	10	23	8.43004	23.2985	0.9	1
52	51	12	9	21	42	1	78	0.512714	0.984	0.984	1	0.984	0.992	0.992	1	0.992	1	0.229531	0.184049	0.0454816	1	0	1.33368	1.5199	1.41615	1.51487	1.47164	1.45125	1	1	1	1	1	1.33368	1.5199	1.41615	1.51487	1.47164	37.4443	45.0896	0	0	324.902	10	28	14.2842	18.1888	0.4	1
70	66	11	13	16	40	1	79	0.519972	0.992	0.992	1	0.992	1	0.992	1	1	1	0.241884	0.191347	0.0505371	1	0	1.26099	1.24036	1.31068	1.40693	1.30007	1.30381	1	1	1	1	1	1.26099	1.24036	1.31068	1.40693	1.30007	37.5861	58.2424	0	0	529.925	9	25	19.9334	25.5977	2.22222	3
44	49	16	14	5	35	0.9875	79	0.435624	0.988	0.988	0.996	0.992	0.988	1	0.996	0.992	1	0.204703	0.160573	0.0441301	1	0	1.6877	1.77287	1.6526	1.71759	1.59324	1.6848	1	1	1	1	1	1.6877	1.77287	1.6526	1.71759	1.59324	53.9287	60.7158	0	0	459.823	10	24	20.7862	25.176	0.7	3
48	34	15	11	17	43	1	80	0.510484	0.988	0.988	0.996	0.992	0.996	0.992	0.996	1	1	0.219657	0.176781	0.0428768	0.951613	0.0483871	1.96846	1.70377	2.12523	2.34032	1.79503	1.98656	0.888889	1	0.923077	1	0.923077	1.99255	1.70377	2.17461	2.34032	1.77616	52.2056	50.0569	1	0	276.739	10	23	5.98629	21.6567	2.4	1
55	62	10	4	9	23	0.974684	77	0.401534	0.956	0.956	0.988	0.968	0.992	0.964	0.996	0.996	0.992	0.19414	0.158434	0.0357058	1	0	1.15856	1.47656	1.16778	1.28709	1.33101	1.2842	1	1	1	1	1	1.15856	1.47656	1.16778	1.28709	1.33101	44.1733	66.67	0	0	239.125	10	28	7.22457	16.6705	0.8	0
54	54	11	14	12	37	0.9875	79	0.546693	0.996	0.996	1	0.996	1	0.996	1	1	1	0.199898	0.159675	0.0402231	1	0	1.4192	1.32422	1.48247	1.62342	1.41692	1.45325	1	1	1	1	1	1.4192	1.32422	1.48247	1.62342	1.41692	39.7716	53.5682	0	0	476.513	9	24	11.5226	28.0717	4.33333	2
63	54	14	12	15	41	1	79	0.436293	0.988	0.988	1	0.988	0.996	0.992	1	0.996	1	0.20178	0.160407	0.0413724	0.983871	0.016129	1.27734	1.47774	1.42334	1.42503	1.33555	1.3878	1	1	1	0.909091	1	1.27734	1.47774	1.42334	1.46951	1.33555	26.9495	39.2505	0	1	212.489	10	27	9.23829	11.9936	0.5	0
58	55	17	7	16	40	0.95	76	0.428615	0.992	0.992	1	0.992	1	0.992	1	1	1	0.178361	0.141242	0.0371197	0.919355	0.0806451	1.54733	1.35825	1.32008	1.60916	1.52428	1.47182	0.933333	0.8	0.928571	0.888889	1	1.55533	1.38549	1.324	1.64182	1.52428	34.3782	46.1973	0	0	388.433	10	24	12.1846	26.6197	1.9	1
59	54	12	8	15	35	1	80	0.646824	0.996	0.996	1	0.996	1	0.996	1	1	1	0.210271	0.168726	0.0415451	0.983871	0.016129	1.27565	1.25062	1.45093	1.15669	1.28357	1.28349	1	1	1	1	0.9375	1.27565	1.25062	1.45093	1.15669	1.28844	38.6675	40.7925	0	0	341.668	10	28	9.83631	24.3133	2.2	1
53	46	20	18	26	64	1	80	0.443229	0.988	0.988	0.996	0.992	0.992	0.996	0.996	0.996	1	0.205024	0.163524	0.0414995	0.983871	0.016129	1.53341	1.71685	1.48137	1.67165	1.46267	1.57319	1	1	0.9	1	1	1.53341	1.71685	1.49783	1.67165	1.46267	46.9754	82.7576	0	9	400.556	10	20	9.68073	30.3572	2.2	2
59	53	14	18	11	43	0.9875	79	0.376728	0.964	0.964	1	0.964	0.992	0.972	1	0.992	1	0.169307	0.134707	0.0345993	1	0	1.31048	1.37161	1.19526	1.15071	1.11173	1.22796	1	1	1	1	1	1.31048	1.37161	1.19526	1.15071	1.11173	32.1661	40.5505	0	0	338.42	10	26	17.323	16.5017	0.6	2
55	53	11	17	7	35	0.95	76	0.482621	0.972	0.972	0.984	0.988	0.988	0.984	0.988	1	0.996	0.209932	0.168033	0.0418987	0.983871	0.016129	1.41936	1.66305	1.48106	1.4255	1.39345	1.47648	0.923077	1	1	1	1	1.41042	1.66305	1.48106	1.4255	1.39345	40.4462	55.4652	0	0	299.166	10	27	9.953	19.9428	0.8	1
75	62	13	20	15	48	0.9625	77	0.410742	0.964	0.964	1	0.964	0.984	0.98	1	0.984	1	0.183824	0.146263	0.0375612	0.983871	0.016129	0.935322	0.981909	0.902127	0.911377	0.909877	0.928122	0.923077	1	1	1	1	0.955068	0.981909	0.902127	0.911377	0.909877	22.1908	35.0721	0	0	165.513	10	30	4.02686	12.5069	3	0
49	55	12	20	14	46	1	78	0.492864	0.984	0.984	0.988	0.996	0.996	0.988	0.996	1	0.992	0.218967	0.177385	0.0415823	0.983871	0.016129	1.5912	1.97515	1.54022	1.76582	1.54665	1.68381	1	1	1	0.923077	1	1.5912	1.97515	1.54022	1.66093	1.54665	43.0928	51.5029	0	0	477.582	10	20	13.7596	29.6474	1.7	3
40	51	16	4	11	31	0.9625	77	0.382029	1	1	1	1	1	1	1	1	1	0.208623	0.166951	0.0416724	1	0	1.72978	1.59953	1.67174	1.66709	1.53442	1.64051	1	1	1	1	1	1.72978	1.59953	1.67174	1.66709	1.53442	32.1587	39.0413	0	1	310.106	10	27	10.7834	20.2108	2.1	1
53	55	19	27	22	68	0.9625	77	0.480373	0.992	0.992	1	0.992	0.992	1	1	0.992	1	0.22574	0.177521	0.0482188	1	0	1.21715	1.21914	1.14137	1.15289	1.15113	1.17633	1	1	1	1	1	1.21715	1.21914	1.14137	1.15289	1.15113	39.2732	72.0718	0	2	286.971	10	21	7.55778	21.1223	1.4	1
54	45	17	14	20	51	0.9875	79	0.385346	1	1	1	1	1	1	1	1	1	0.198478	0.158869	0.0396094	1	0	1.06564	1.11929	0.997421	1.10768	1.0882	1.07565	1	1	1	1	1	1.06564	1.11929	0.997421	1.10768	1.0882	29.374	38.4614	0	0	505.496	7	21	4.72281	15.5193	2.42857	0
58	48	14	15	13	42	0.9875	79	0.448624	0.988	0.988	1	0.988	0.996	0.992	1	0.996	1	0.192404	0.154394	0.0380098	1	0	1.59839	1.66117	1.58857	1.58748	1.46853	1.58083	1	1	1	1	1	1.59839	1.66117	1.58857	1.58748	1.46853	36.9015	40.9048	0	0	325.549	10	27	6.92767	24.2974	1.7	1
60	57	8	13	14	35	0.576923	15	0.592822	0.98	0.98	0.992	0.988	0.992	0.988	0.996	0.996	0.996	0.228069	0.182573	0.0454959	1	0	1.51459	1.3943	1.43155	1.46753	1.6883	1.49925	1	1	1	1	1	1.51459	1.3943	1.43155	1.46753	1.6883	47.4017	65.184	0	0	307.874	10	30	7.08099	23.6873	1.5	1
54	54	11	9	15	35	1	80	0.448965	0.98	0.98	0.996	0.984	0.996	0.984	0.996	1	1	0.188528	0.149534	0.038994	1	0	1.80042	2.02131	2.05718	1.77056	1.79881	1.88966	1	1	1	1	1	1.80042	2.02131	2.05718	1.77056	1.79881	47.376	67.1514	0	1	457.403	10	27	12.3088	33.413	2	3
64	55	12	6	11	29	0.9625	77	0.460693	0.848	0.848	0.98	0.868	0.952	0.896	0.988	0.964	0.992	0.196566	0.15773	0.0388362	1	0	1.16757	1.18172	1.20786	1.18331	1.13341	1.17477	1	1	1	1	1	1.16757	1.18172	1.20786	1.18331	1.13341	41.5998	43.7445	4	0	305.17	10	30	21.7649	8.17951	0.1	1
58	67	11	11	5	27	1	80	0.458164	0.956	0.956	0.992	0.964	0.984	0.972	0.992	0.992	1	0.212325	0.168388	0.0439369	1	0	1.49585	1.35069	1.2701	1.28891	1.32131	1.34537	1	1	1	1	1	1.49585	1.35069	1.2701	1.28891	1.32131	37.822	44.3382	0	0	233.391	10	26	4.74416	18.5785	3.3	2
54	54	10	10	10	30	0.9875	79	0.397238	0.996	0.996	1	0.996	1	0.996	1	1	1	0.213888	0.170417	0.0434707	1	0	1.12519	1.15491	1.21169	1.12358	1.18084	1.15924	1	1	1	1	1	1.12519	1.15491	1.21169	1.12358	1.18084	37.7339	51.7109	0	0	200.784	10	29	5.43999	14.6216	0.6	0
58	57	10	11	7	28	1	80	0.430981	0.984	0.984	0.992	0.992	0.988	0.996	0.996	0.992	0.996	0.194836	0.155566	0.0392699	1	0	1.87804	1.66052	1.68787	1.89219	1.86991	1.79771	1	1	1	1	1	1.87804	1.66052	1.68787	1.89219	1.86991	42.0221	45.8613	1	0	253.782	10	30	4.90322	20.4549	2	0
61	60	6	2	18	26	1	80	0.465926	0.992	0.992	1	0.992	1	0.992	1	1	1	0.235227	0.186152	0.0490742	1	0	1.53491	1.39294	1.31845	1.41924	1.28416	1.38994	1	1	1	1	1	1.53491	1.39294	1.31845	1.41924	1.28416	37.4893	66.0162	0	2	345.181	10	28	17.1818	17.3123	0.3	0
58	61	12	6	15	33	0.9875	79	0.424902	0.964	0.964	0.996	0.968	0.988	0.976	0.996	0.992	1	0.190111	0.149485	0.0406261	1	0	1.64628	1.66821	1.7406	1.81978	1.7331	1.72159	1	1	1	1	1	1.64628	1.66821	1.7406	1.81978	1.7331	42.1033	62.8281	0	1	296.55	10	28	9.55314	20.0723	1	1
52	54	10	12	17	39	0.958333	69	0.528991	0.972	0.972	0.996	0.976	0.992	0.98	1	0.992	0.996	0.25355	0.204633	0.048917	1	0	2.49998	1.96686	2.08972	2.43405	2.29361	2.25684	1	1	1	1	1	2.49998	1.96686	2.08972	2.43405	2.29361	50.2526	72.436	0	0	639.888	9	24	11.3237	46.4134	3.22222	4
58	54	20	18	13	51	0.961538	75	0.552764	0.976	0.976	0.996	0.98	0.988	0.988	0.996	0.992	1	0.231943	0.184247	0.0476955	0.967742	0.0322581	1.35132	1.2656	1.18884	1.24805	1.25947	1.26266	1	0.916667	0.9	1	1	1.35132	1.24197	1.22936	1.24805	1.25947	32.8418	34.1946	0	0	248.13	10	22	6.94244	17.8155	1.4	0
55	53	14	14	13	41	0.9875	79	0.509458	1	1	1	1	1	1	1	1	1	0.21663	0.172651	0.0439794	1	0	1.32587	1.20373	1.29667	1.14004	1.45678	1.28462	1	1	1	1	1	1.32587	1.20373	1.29667	1.14004	1.45678	37.6697	46.6428	2	0	216.143	10	30	7.75585	13.8313	1.2	0
57	57	12	11	17	40	0.9875	79	0.436839	0.984	0.984	1	0.984	0.988	0.996	1	0.988	1	0.215194	0.169609	0.0455858	1	0	1.75257	1.66224	1.63776	1.73023	1.77832	1.71223	1	1	1	1	1	1.75257	1.66224	1.63776	1.73023	1.77832	67.3989	69.106	0	0	354.205	10	28	7.39979	28.0031	2.2	1
31	40	8	9	15	32	1	78	0.608535	0.996	0.996	0.996	1	0.996	1	0.996	1	1	0.243967	0.196391	0.0475762	1	0	1.29425	1.49361	1.44029	1.38382	1.36861	1.39612	1	1	1	1	1	1.29425	1.49361	1.44029	1.38382	1.36861	38.4108	57.6516	0	0	404.532	9	25	11.7181	19.8784	1	0
59	49	13	9	28	50	1	80	0.443172	0.996	0.996	1	0.996	1	0.996	1	1	1	0.183952	0.146557	0.0373947	1	0	1.04432	1.11223	1.204	0.988255	1.14024	1.09781	1	1	1	1	1	1.04432	1.11223	1.204	0.988255	1.14024	41.655	36.7494	0	0	329.556	10	23	9.83293	23.0999	1.6	3
61	59	10	6	11	27	1	80	0.44043	0.98	0.98	1	0.98	0.996	0.984	1	0.996	1	0.230075	0.183337	0.0467385	1	0	1.25115	1.50932	1.56576	1.37137	1.44387	1.4283	1	1	1	1	1	1.25115	1.50932	1.56576	1.37137	1.44387	50.3389	65.7183	0	1	313.031	9	27	6.89715	14.5353	0.555556	0
53	58	18	25	21	64	0.975	78	0.559639	1	1	1	1	1	1	1	1	1	0.220143	0.174084	0.0460591	0.983871	0.016129	1.54616	1.4311	1.6512	1.50356	1.93339	1.61308	1	0.888889	1	1	1	1.54616	1.40085	1.6512	1.50356	1.93339	52.6641	66.6426	0	1	448.44	10	26	10.8661	33.9611	2.1	3
45	51	24	30	25	79	0.975	78	0.461699	0.984	0.984	1	0.984	0.992	0.992	1	0.992	1	0.220522	0.172866	0.0476551	1	0	1.39112	1.56107	1.38188	1.48801	1.56837	1.47809	1	1	1	1	1	1.39112	1.56107	1.38188	1.48801	1.56837	44.064	34.1152	2	0	254.223	10	27	6.90051	18.5057	1.7	0
56	58	13	21	14	48	1	79	0.44456	0.992	0.992	1	0.992	0.992	1	1	0.992	1	0.19583	0.156232	0.0395978	0.983871	0.016129	1.50059	1.44117	1.31306	1.43698	1.71695	1.48175	1	0.928571	1	1	1	1.50059	1.38035	1.31306	1.43698	1.71695	32.5991	36.8499	0	0	441.47	10	25	8.6082	35.5217	2.4	1
71	64	11	22	13	46	1	80	0.537142	0.988	0.988	1	0.988	0.996	0.992	1	0.996	1	0.226872	0.181148	0.045724	0.951613	0.0483871	1.1385	1.1483	1.11333	1.00136	1.05079	1.09046	1	0.923077	0.923077	0.933333	1	1.1385	1.16763	1.14347	1.02012	1.05079	36.7731	39.8759	0	0	485.364	8	20	8.41456	20.2311	2.5	1
51	62	13	16	21	50	0.987342	78	0.497271	0.984	0.984	0.996	0.988	0.992	0.992	0.996	0.996	1	0.21538	0.170683	0.0446966	1	0	1.73523	1.64414	2.06608	1.72734	1.73072	1.7807	1	1	1	1	1	1.73523	1.64414	2.06608	1.72734	1.73072	39.3579	54.3462	0	1	272.792	10	28	4.57264	22.6983	1.5	1
38	46	21	15	21	57	1	80	0.472678	0.996	0.996	1	0.996	1	0.996	1	1	1	0.204682	0.163177	0.0415049	1	0	1.67896	1.72635	1.6471	1.94667	1.85725	1.77127	1	1	1	1	1	1.67896	1.72635	1.6471	1.94667	1.85725	38.4072	51.2134	0	0	357.685	10	28	9.70381	26.0323	1.4	1
46	50	16	13	19	48	0.975	78	0.481235	0.992032	0.992032	1	0.992032	0.992032	1	1	0.992032	1	0.208359	0.166773	0.0415863	1	0	1.70125	1.82493	1.48773	1.5716	1.79892	1.67689	1	1	1	1	1	1.70125	1.82493	1.48773	1.5716	1.79892	48.9028	64.4602	0	1	459.523	9	25	15.2833	22.4233	1.22222	0
67	64	12	14	9	35	0.75	12	0.171305	0.9	0.9	0.972	0.928	0.948	0.952	0.98	0.968	0.992	0.2045	0.1574	0.0471007	1	0	1.2287	1.38219	1.3764	1.47495	1.24294	1.34104	1	1	1	1	1	1.2287	1.38219	1.3764	1.47495	1.24294	51.1864	47.6161	6	0	289.039	10	29	5.87817	23.0018	2.7	1
54	62	7	12	16	35	1	78	0.523951	0.988	0.988	0.992	0.996	0.988	1	0.992	0.996	1	0.245366	0.194638	0.0507281	1	0	1.29041	1.33404	1.53562	1.29591	1.36735	1.36466	1	1	1	1	1	1.29041	1.33404	1.53562	1.29591	1.36735	33.24	45.4694	0	0	250.39	10	30	12.4743	12.5467	0.6	0
70	57	10	13	12	35	1	4	0.487366	0.984	0.984	1	0.984	0.992	0.992	1	0.992	1	0.210881	0.168273	0.042608	0.983871	0.016129	1.42114	1.28349	1.55185	1.67101	1.3152	1.44854	0.909091	1	1	1	1	1.42368	1.28349	1.55185	1.67101	1.3152	46.5188	51.619	4	0	295.025	10	23	5.94788	23.5373	2.9	1
52	45	14	22	19	55	1	80	0.439178	0.996	0.996	0.996	1	0.996	1	0.996	1	1	0.199739	0.154471	0.0452685	1	0	1.06576	1.04924	1.15216	1.04275	1.0436	1.0707	1	1	1	1	1	1.06576	1.04924	1.15216	1.04275	1.0436	59.4973	60.9839	13	2	222.366	10	30	8.99178	13.23	1.3	0
59	60	13	12	9	34	0.975	78	0.633329	0.992	0.992	0.996	0.996	0.992	1	0.996	0.996	1	0.233611	0.186849	0.0467623	1	0	1.30305	1.35013	1.48592	1.26924	1.14523	1.31071	1	1	1	1	1	1.30305	1.35013	1.48592	1.26924	1.14523	27.8517	44.2012	0	1	222.865	10	30	6.2796	15.9896	2.4	0
65	69	18	18	22	58	0.898734	71	0.495654	0.988	0.988	1	0.988	1	0.988	1	1	1	0.224445	0.177035	0.0474107	1	0	1.47095	1.26395	1.14276	1.24095	1.30373	1.28447	1	1	1	1	1	1.47095	1.26395	1.14276	1.24095	1.30373	45.9752	61.4303	0	3	362.091	10	22	6.23313	29.9611	3.6	2
54	55	12	18	16	46	0.975	78	0.457631	0.996	0.996	1	0.996	0.996	1	1	0.996	1	0.2116	0.169564	0.0420368	1	0	0.992269	1.00615	1.04839	1.0502	1.03026	1.02545	1	1	1	1	1	0.992269	1.00615	1.04839	1.0502	1.03026	29.926	41.9009	0	0	158.448	10	30	5.75115	10.0555	0.1	0
51	61	11	9	12	32	0.975	78	0.450308	0.996	0.996	1	0.996	1	0.996	1	1	1	0.203184	0.161547	0.0416376	1	0	1.39064	1.49045	1.29647	1.49372	1.30762	1.39578	1	1	1	1	1	1.39064	1.49045	1.29647	1.49372	1.30762	40.313	42.2703	0	0	249.268	10	29	4.54889	20.3509	1.8	0
47	57	18	21	28	67	0.975	78	0.481145	0.96	0.96	0.972	0.988	0.972	0.988	0.98	0.992	0.992	0.208755	0.167211	0.0415445	0.983871	0.016129	1.50994	1.34034	1.49949	1.41411	1.30422	1.41362	0.909091	1	1	1	1	1.56276	1.34034	1.49949	1.41411	1.30422	42.1808	86.396	0	7	218.145	10	24	6.80734	14.9883	1.1	0
53	49	10	11	18	39	1	80	0.43407	0.996	0.996	1	0.996	1	0.996	1	1	1	0.187946	0.150179	0.0377668	1	0	1.43373	1.6126	1.15293	1.25757	1.22089	1.33554	1	1	1	1	1	1.43373	1.6126	1.15293	1.25757	1.22089	40.4092	56.0371	1	3	249.984	10	27	7.9332	17.0476	1.1	0
71	54	12	10	11	33	0.9875	79	0.43832	1	1	1	1	1	1	1	1	1	0.214648	0.171291	0.0433579	1	0	1.0365	1.17494	1.15285	1.06117	1.15271	1.11563	1	1	1	1	1	1.0365	1.17494	1.15285	1.06117	1.15271	33.2839	39.1824	0	0	202.323	10	29	8.78486	11.4112	0.6	0
60	60	11	13	9	33	0.987342	78	0.440101	1	1	1	1	1	1	1	1	1	0.198419	0.157825	0.0405937	1	0	1.45775	1.40604	1.33588	1.31495	1.3201	1.36694	1	1	1	1	1	1.45775	1.40604	1.33588	1.31495	1.3201	31.1665	33.368	0	0	327.657	10	27	15.0898	17.6501	0.8	1
53	63	8	19	9	36	0.961538	75	0.476947	0.924	0.924	0.976	0.948	0.964	0.96	0.976	0.988	1	0.233004	0.185167	0.0478368	1	0	1.88316	1.6865	1.5643	1.69755	1.46774	1.65985	1	1	1	1	1	1.88316	1.6865	1.5643	1.69755	1.46774	41.2688	75.9773	0	3	334.317	10	23	8.98832	24.4018	1.3	0
58	54	10	11	17	38	0.9875	79	0.381433	0.996	0.996	1	0.996	0.996	1	1	0.996	1	0.192296	0.154367	0.037929	1	0	1.22442	1.21484	1.28071	1.17146	1.13716	1.20572	1	1	1	1	1	1.22442	1.21484	1.28071	1.17146	1.13716	33.631	41.6356	0	0	315.636	10	28	12.1415	19.4044	0.8	1
71	68	12	15	12	39	0.961538	75	0.438936	0.964	0.964	0.992	0.972	0.992	0.972	0.996	0.996	0.996	0.184847	0.149626	0.0352211	1	0	1.37483	1.43518	1.57732	1.35407	1.46547	1.44137	1	1	1	1	1	1.37483	1.43518	1.57732	1.35407	1.46547	22.6528	37.7656	0	3	170.193	10	23	4.98939	12.0123	1.3	0
49	55	12	16	19	47	0.9875	79	0.529927	0.992	0.992	0.996	0.996	0.992	1	0.996	0.996	1	0.228646	0.180589	0.0480563	1	0	1.40535	1.59373	1.53234	1.42091	1.72552	1.53557	1	1	1	1	1	1.40535	1.59373	1.53234	1.42091	1.72552	42.7363	58.501	0	3	495.041	10	30	16.7917	32.6944	1.4	3
60	59	13	11	14	38	0.9875	79	0.485837	0.992	0.992	1	0.992	0.996	0.996	1	0.996	1	0.229562	0.184	0.0455613	1	0	1.59642	1.22861	1.17507	1.17531	1.42766	1.32061	1	1	1	1	1	1.59642	1.22861	1.17507	1.17531	1.42766	37.6156	60.856	0	0	275.857	10	26	6.99131	20.5709	1.4	0
34	50	19	7	5	31	0.925	74	0.424074	0.956	0.956	0.98	0.976	0.984	0.972	0.988	0.996	0.992	0.281984	0.229694	0.0522892	1	0	1.20005	1.16638	1.26539	1.2339	1.47902	1.26895	1	1	1	1	1	1.20005	1.16638	1.26539	1.2339	1.47902	24.5963	33.7976	0	0	192.487	10	27	6.06973	13.0327	1.8	0
58	69	12	14	7	33	0.925	74	0.422531	0.948	0.948	0.996	0.952	0.988	0.96	1	0.988	0.996	0.204447	0.162774	0.0416728	1	0	1.49872	1.50515	1.51131	1.78264	1.58728	1.57702	1	1	1	1	1	1.49872	1.50515	1.51131	1.78264	1.58728	37.0043	45.3759	0	1	288.826	10	25	6.27794	22.5888	1.3	0
46	43	20	23	26	69	1	80	0.464838	0.996	0.996	1	0.996	0.996	1	1	0.996	1	0.216156	0.172704	0.0434512	1	0	1.42008	1.44861	1.51325	1.76595	1.4484	1.51926	1	1	1	1	1	1.42008	1.44861	1.51325	1.76595	1.4484	35.6209	42.4511	0	0	309.962	10	23	8.91805	22.025	0.7	1
50	59	17	20	13	50	0.9875	79	0.418281	0.992	0.992	1	0.992	0.996	0.996	1	0.996	1	0.212155	0.16721	0.0449445	0.983871	0.016129	1.69894	1.14009	1.86287	1.47335	1.1982	1.47469	1	1	0.933333	1	1	1.69894	1.14009	1.1911	1.47335	1.1982	27.5632	58.6919	0	2	638.906	7	19	19.9417	19.8829	0.428571	0
56	57	12	14	11	37	0.9875	79	0.454664	0.952	0.952	1	0.952	0.992	0.96	1	0.992	1	0.226297	0.17711	0.0491872	1	0	1.18715	1.14303	1.30089	1.1986	1.14125	1.19418	1	1	1	1	1	1.18715	1.14303	1.30089	1.1986	1.14125	38.8635	57.8252	0	3	320.172	10	24	6.55444	25.4452	3	1
52	69	13	10	18	41	0.987179	77	0.449352	0.732	0.732	0.924	0.808	0.908	0.824	0.944	0.964	0.98	0.194655	0.163201	0.0314548	1	0	1.85097	1.67086	1.57776	1.49422	1.61151	1.64106	1	1	1	1	1	1.85097	1.67086	1.57776	1.49422	1.61151	45.9001	53.8917	1	0	403.622	9	24	9.04926	22.4446	1.88889	0
44	40	9	14	11	34	0.975	78	0.383289	1	1	1	1	1	1	1	1	1	0.186749	0.149146	0.0376025	1	0	1.12565	1.1997	1.18828	1.13376	1.18883	1.16724	1	1	1	1	1	1.12565	1.1997	1.18828	1.13376	1.18883	34.636	45.7181	0	0	287.915	10	29	11.0595	17.715	1.2	1
56	54	15	15	20	50	1	79	0.418337	0.984	0.984	1	0.984	0.996	0.988	1	0.996	1	0.217827	0.172415	0.0454121	1	0	2.05204	1.83841	1.83572	2.2243	2.10153	2.0104	1	1	1	1	1	2.05204	1.83841	1.83572	2.2243	2.10153	91.1526	94.1436	6	7	409.901	10	25	7.7687	33.1988	3.4	1
53	59	15	12	13	40	0.9875	79	0.473182	0.976	0.976	0.996	0.98	0.992	0.984	0.996	0.996	1	0.236602	0.189239	0.0473633	1	0	1.32583	1.36911	1.40908	1.29879	1.51718	1.384	1	1	1	1	1	1.32583	1.36911	1.40908	1.29879	1.51718	34.9933	49.3854	0	0	369.163	10	28	21.7246	15.1741	0.3	1
74	69	9	16	6	31	0.948052	73	0.576872	0.976	0.976	0.992	0.984	0.988	0.988	0.992	0.996	1	0.256554	0.204262	0.0522921	0.951613	0.0483871	1.64561	1.72269	1.95668	1.80669	1.82318	1.79097	1	0.923077	1	1	0.866667	1.64561	1.68791	1.95668	1.80669	1.86178	61.2871	93.8726	1	1	450.168	9	27	5.77626	30.8904	3.44444	1
49	47	14	14	11	39	1	79	0.448185	0.996	0.996	1	0.996	1	0.996	1	1	1	0.187771	0.149063	0.0387076	1	0	1.2076	1.22895	1.22931	1.11563	1.29604	1.21551	1	1	1	1	1	1.2076	1.22895	1.22931	1.11563	1.29604	41.632	54.1511	0	0	310.404	10	24	8.27156	22.752	3.4	1
51	55	14	13	11	38	0.975	78	0.581217	0.98	0.98	0.992	0.988	0.992	0.988	0.992	1	1	0.198884	0.157189	0.0416952	1	0	1.59467	1.70114	1.4583	1.5585	1.63007	1.58853	1	1	1	1	1	1.59467	1.70114	1.4583	1.5585	1.63007	64.5889	108.703	9	15	599.34	9	23	16.5077	36.7358	1.22222	3
53	46	12	24	24	60	0.986487	73	0.504301	0.984	0.984	0.988	0.996	0.988	0.996	0.992	0.996	0.996	0.205006	0.16469	0.040316	0.903226	0.0967742	1.32864	1.42201	1.37691	1.18278	1.2879	1.31965	0.909091	1	0.818182	0.888889	0.882353	1.26432	1.42201	1.35457	1.15771	1.25393	56.7501	44.6494	5	0	471.502	10	21	11.9261	35.1975	5.3	2
61	52	19	12	15	46	1	80	0.435303	1	1	1	1	1	1	1	1	1	0.205944	0.164943	0.041001	1	0	1.25868	1.19109	1.20346	1.32512	1.19602	1.23488	1	1	1	1	1	1.25868	1.19109	1.20346	1.32512	1.19602	34.5866	50.1026	0	0	362.589	10	29	6.97771	29.2633	5.5	2
53	42	14	15	16	45	1	80	0.477856	0.996	0.996	0.996	1	0.996	1	0.996	1	1	0.216986	0.173126	0.0438595	1	0	1.31236	1.38561	1.43922	1.19582	1.25391	1.31738	1	1	1	1	1	1.31236	1.38561	1.43922	1.19582	1.25391	41.1599	66.3713	0	0	360.881	9	26	10.5798	16.1689	0.555556	1
64	47	8	11	9	28	1	79	0.455359	0.996	0.996	1	0.996	0.996	1	1	0.996	1	0.201035	0.159582	0.0414529	1	0	1.23008	1.33266	1.18333	1.20326	1.15845	1.22156	1	1	1	1	1	1.23008	1.33266	1.18333	1.20326	1.15845	42.2841	67.0582	1	5	327.96	10	25	6.37759	26.4221	3.2	1
43	61	31	26	15	72	0.9875	79	0.451535	0.976	0.976	0.996	0.98	0.992	0.984	1	0.992	0.996	0.19823	0.158321	0.039909	0.983871	0.016129	1.46372	1.63477	1.54157	1.41301	1.54916	1.52045	1	1	1	1	0.933333	1.46372	1.63477	1.54157	1.41301	1.58655	42.9237	59.2964	0	0	279.322	10	28	7.01998	20.8946	2.6	1
50	60	22	10	6	38	1	80	0.442505	0.00400001	0.00400001	0.504	0.5	0.5	0.504	0.6	0.9	0.904	0.350288	0	0.350288	1	0	1.10273	1.20569	1.09807	1.3602	1.18129	1.1896	1	1	1	1	1	1.10273	1.20569	1.09807	1.3602	1.18129	30.0552	56.2344	0	0	163.558	10	27	5.18304	11.1567	1.2	0
47	52	15	9	7	31	0.9875	79	0.504843	0.984	0.984	1	0.984	0.992	0.992	1	0.992	1	0.193718	0.1547	0.0390183	0.983871	0.016129	1.50661	1.41511	1.36447	1.42304	1.43335	1.42852	1	0.928571	1	1	1	1.50661	1.40884	1.36447	1.42304	1.43335	39.2007	66.7119	0	0	194.46	10	30	4.96343	14.4653	1.2	0
61	55	16	11	15	42	0.9875	79	0.542296	0.996	0.996	1	0.996	1	0.996	1	1	1	0.25329	0.201736	0.0515548	0.983871	0.016129	1.52779	1.5464	1.72557	1.72936	1.68433	1.64269	1	1	1	1	0.909091	1.52779	1.5464	1.72557	1.72936	1.69857	45.3075	57.8083	0	0	325.924	10	26	9.42814	23.1466	1.6	2
57	56	11	12	9	32	1	80	0.509719	0.996	0.996	0.996	1	0.996	1	0.996	1	1	0.240732	0.193634	0.0470981	1	0	1.40106	1.31393	1.23733	1.1806	1.2846	1.2835	1	1	1	1	1	1.40106	1.31393	1.23733	1.1806	1.2846	38.2113	50.8113	1	0	245.835	10	28	7.07336	17.4722	1.3	0
48	54	18	19	16	53	1	80	0.450864	1	1	1	1	1	1	1	1	1	0.206835	0.165961	0.040874	1	0	1.27719	1.34528	1.29405	1.29779	1.52051	1.34696	1	1	1	1	1	1.27719	1.34528	1.29405	1.29779	1.52051	37.4626	55.1135	0	1	332.103	10	29	16.8805	16.3124	0.6	0
60	53	15	16	15	46	0.9875	79	0.492051	0.972	0.972	0.984	0.988	0.988	0.984	0.988	1	0.996	0.223626	0.178992	0.0446345	0.967742	0.0322581	1.56281	1.37438	1.37954	1.35088	1.17188	1.3679	0.916667	1	0.923077	1	1	1.60438	1.37438	1.38055	1.35088	1.17188	32.4531	55.0352	0	0	386.522	10	25	12.539	26.0803	1.3	1
57	54	11	7	14	32	1	80	0.434348	1	1	1	1	1	1	1	1	1	0.222576	0.177596	0.0449805	1	0	1.51921	1.42252	1.46905	1.35454	1.46112	1.44529	1	1	1	1	1	1.51921	1.42252	1.46905	1.35454	1.46112	36.9971	76.9062	0	1	494.212	10	30	37.9059	11.4956	0	3
49	56	13	7	21	41	0.9875	79	0.571704	0.992	0.992	1	0.992	0.996	0.996	1	0.996	1	0.244936	0.192823	0.0521121	1	0	1.77043	1.6815	1.54932	1.60593	1.73162	1.66776	1	1	1	1	1	1.77043	1.6815	1.54932	1.60593	1.73162	60.6377	91.7756	0	1	604.82	10	24	18.7443	41.7185	2.2	5
72	66	10	15	22	47	1	80	0.409281	0.956	0.956	1	0.956	0.988	0.968	1	0.988	1	0.202201	0.159242	0.0429585	1	0	0.948337	1.04403	1.14247	0.950124	1.0442	1.02583	1	1	1	1	1	0.948337	1.04403	1.14247	0.950124	1.0442	28.6626	38.2578	1	0	356.247	10	28	17.0728	18.5362	1	3
64	58	14	14	18	46	1	78	0.580517	0.992	0.992	0.992	1	0.996	0.996	0.996	1	0.996	0.286573	0.231142	0.0554317	1	0	1.43135	1.41514	1.48229	1.391	1.263	1.39656	1	1	1	1	1	1.43135	1.41514	1.48229	1.391	1.263	29.6481	71.7569	0	10	278.762	10	29	8.03786	19.772	2	0
48	49	17	22	16	55	1	9	0.766663	1	1	1	1	1	1	1	1	1	0.218863	0.174949	0.0439141	0.983871	0.016129	1.38257	1.22339	1.17179	1.23533	1.15051	1.23272	1	1	0.928571	1	1	1.38257	1.22339	1.17591	1.23533	1.15051	29.888	40.6458	0	1	536.756	10	22	7.43071	46.2143	4.7	5
64	54	11	14	13	38	1	80	0.405452	0.98	0.98	0.992	0.988	0.992	0.988	0.996	0.996	0.996	0.195057	0.157163	0.0378941	0.967742	0.0322581	1.09904	1.0416	0.999344	1.13868	1.16165	1.08806	1	0.928571	0.909091	1	1	1.09904	1.03633	0.974453	1.13868	1.16165	25.9962	34.4135	0	0	243.163	10	27	6.37092	17.9285	2.2	0
54	56	16	18	20	54	0.925	74	0.416596	0.952	0.952	0.972	0.98	0.98	0.972	0.988	0.992	0.984	0.212103	0.171054	0.0410485	1	0	1.96277	2.00574	1.86883	1.75776	1.52246	1.82351	1	1	1	1	1	1.96277	2.00574	1.86883	1.75776	1.52246	44.5508	72.2188	0	3	425.668	10	24	10.7531	31.8031	2.8	3
54	34	14	12	10	36	0.975	78	0.447414	0.992	0.992	1	0.992	0.996	0.996	1	0.996	1	0.202905	0.16198	0.0409251	1	0	1.08466	1.12729	1.17105	1.08362	1.09507	1.11234	1	1	1	1	1	1.08466	1.12729	1.17105	1.08362	1.09507	39.1177	64.0044	0	0	251.22	10	27	10.8991	14.206	0.5	0
60	55	10	7	11	28	1	80	0.468166	0.988	0.988	0.988	1	0.992	0.996	0.992	1	0.996	0.20894	0.166744	0.0421958	1	0	1.15021	1.1551	1.20584	1.15167	1.09286	1.15114	1	1	1	1	1	1.15021	1.1551	1.20584	1.15167	1.09286	31.9797	51.0627	0	1	275.55	10	26	10.3614	17.177	1.8	1
48	43	18	26	16	60	1	78	0.498168	0.02	0.02	0.52	0.5	0.52	0.5	0.62	0.9	0.9	0.39104	0.39104	0	1	0	1.2496	1.36312	1.33971	1.48164	1.54301	1.39542	1	1	1	1	1	1.2496	1.36312	1.33971	1.48164	1.54301	44.9326	58.6436	0	0	281.68	10	30	9.9531	18.1988	1.4	0
49	36	21	23	13	57	1	78	0.632784	0.992	0.992	1	0.992	0.996	0.996	1	0.996	1	0.231842	0.18621	0.0456317	1	0	1.67484	1.55504	1.53056	1.77954	1.5733	1.62266	1	1	1	1	1	1.67484	1.55504	1.53056	1.77954	1.5733	51.2999	72.4485	2	0	250.896	10	28	7.1915	17.8807	1.2	0
70	62	14	13	17	44	1	80	0.48613	0.976	0.976	1	0.976	0.996	0.98	1	0.996	1	0.203515	0.163074	0.0404415	1	0	1.90936	1.76711	1.46519	1.51908	1.73674	1.6795	1	1	1	1	1	1.90936	1.76711	1.46519	1.51908	1.73674	40.9246	66.5312	0	0	359.48	10	30	18.2548	17.6712	0.3	2
73	70	15	13	7	35	1	80	0.519983	0.952	0.952	0.968	0.984	0.972	0.98	0.976	0.996	0.992	0.24183	0.192186	0.0496431	1	0	1.39041	1.34533	1.56489	1.5391	1.44254	1.45645	1	1	1	1	1	1.39041	1.34533	1.56489	1.5391	1.44254	44.092	59.1871	0	0	277.512	10	28	10.5403	17.1939	1.5	0
54	52	14	14	15	43	0.9375	75	0.465094	0.984	0.984	1	0.984	0.988	0.996	1	0.988	1	0.225395	0.17805	0.0473449	1	0	1.28359	1.48231	1.29568	1.20467	1.14736	1.28272	1	1	1	1	1	1.28359	1.48231	1.29568	1.20467	1.14736	36.4608	57.14	0	0	393.039	10	26	15.1995	24.0708	2	3
71	60	8	9	20	37	1	80	0.478381	0.972	0.972	1	0.972	0.996	0.976	1	0.996	1	0.210128	0.169167	0.0409604	0.967742	0.0322581	1.34938	1.29415	1.54074	1.42707	1.30312	1.38289	0.933333	1	1	0.916667	1	1.34883	1.29415	1.54074	1.46239	1.30312	34.3239	48.1889	0	1	247.842	10	27	6.06357	18.7023	1.9	1
60	54	12	16	13	41	0.9875	79	0.446447	1	1	1	1	1	1	1	1	1	0.210384	0.167575	0.0428096	1	0	1.49072	1.44604	1.59221	1.4647	1.46741	1.49222	1	1	1	1	1	1.49072	1.44604	1.59221	1.4647	1.46741	43.5942	52.9011	0	0	404.199	10	26	11.9898	28.412	1.7	3
56	51	17	24	18	59	0.555556	15	0.338114	0.948	0.948	0.952	0.996	0.96	0.988	0.96	1	0.992	0.225919	0.180639	0.0452793	1	0	0.989236	1.13377	1.29351	1.12054	1.42067	1.19155	1	1	1	1	1	0.989236	1.13377	1.29351	1.12054	1.42067	47.698	81.8519	0	1	314.763	10	27	12.406	19.0531	1.3	1
51	38	16	18	24	58	0.924051	73	0.50091	0.932	0.932	0.996	0.936	0.976	0.956	0.996	0.98	1	0.232289	0.18241	0.0498791	1	0	1.46288	1.35062	1.52022	1.43947	1.47674	1.44999	1	1	1	1	1	1.46288	1.35062	1.52022	1.43947	1.47674	31.2024	54.8831	0	0	319.937	10	23	4.08732	27.8889	4.2	1
68	63	13	17	18	48	1	80	0.409724	1	1	1	1	1	1	1	1	1	0.166705	0.131869	0.0348369	0.983871	0.016129	1.03021	1.03459	0.992554	0.99941	0.96392	1.00414	1	0.9	1	1	1	1.03021	1.03659	0.992554	0.99941	0.96392	42.8186	45.7717	0	1	256.416	10	27	9.32775	16.297	2	0
50	56	27	16	15	58	1	80	0.480173	0.992	0.992	1	0.992	0.996	0.996	1	0.996	1	0.204683	0.16086	0.0438237	1	0	1.36433	1.03201	1.33382	1.11672	1.15016	1.19941	1	1	1	1	1	1.36433	1.03201	1.33382	1.11672	1.15016	32.0886	52.7512	0	0	507.938	10	29	31.2753	19.501	0.6	3
60	58	13	3	14	30	1	80	0.425314	0.996	0.996	1	0.996	1	0.996	1	1	1	0.197415	0.158108	0.0393066	1	0	1.89427	1.58977	1.73804	1.73124	1.92771	1.77621	1	1	1	1	1	1.89427	1.58977	1.73804	1.73124	1.92771	43.2075	66.6125	0	0	328.282	10	28	9.70226	23.112	1.7	0
63	56	10	5	13	28	0.974684	77	0.559209	0.936	0.936	0.96	0.976	0.952	0.984	0.96	0.992	1	0.254733	0.202512	0.0522211	1	0	1.33647	1.32758	1.46895	1.15433	1.52456	1.36238	1	1	1	1	1	1.33647	1.32758	1.46895	1.15433	1.52456	36.9512	63.269	0	4	390.819	10	23	10.4553	24.1998	2	1
48	54	13	12	26	51	1	80	0.429333	0.996	0.996	1	0.996	0.996	1	1	0.996	1	0.198083	0.157144	0.0409392	0.983871	0.016129	1.17393	1.16061	1.11264	1.25995	1.18105	1.17764	0.9	1	1	1	1	1.10975	1.16061	1.11264	1.25995	1.18105	33.0203	51.4075	0	0	366.406	9	27	9.65169	17.7055	2.33333	1
70	67	11	22	21	54	1	79	0.461417	1	1	1	1	1	1	1	1	1	0.2169	0.17341	0.0434902	1	0	1.22187	1.21153	1.15283	1.16175	1.26969	1.20353	1	1	1	1	1	1.22187	1.21153	1.15283	1.16175	1.26969	38.5752	47.4788	0	0	397.767	10	28	14.0761	25.6739	2.2	2
60	52	11	12	16	39	1	39	0.563927	1	1	1	1	1	1	1	1	1	0.214201	0.170759	0.0434424	1	0	1.68086	1.31095	1.42848	1.48416	1.41754	1.4644	1	1	1	1	1	1.68086	1.31095	1.42848	1.48416	1.41754	35.7485	57.1708	0	2	352.86	10	28	8.08684	27.1808	2.9	2
63	54	16	23	22	61	0.9875	79	0.529311	0.992	0.992	1	0.992	0.996	0.996	1	0.996	1	0.238967	0.192234	0.0467328	1	0	1.52767	1.57652	1.593	1.49119	1.46123	1.52992	1	1	1	1	1	1.52767	1.57652	1.593	1.49119	1.46123	40.8705	64.9979	0	1	572.037	9	23	10.8225	39.3797	3.77778	2
57	68	14	13	11	38	1	79	0.528433	1	1	1	1	1	1	1	1	1	0.240961	0.191741	0.0492207	1	0	1.98196	1.96888	2.30428	2.35467	1.7886	2.07968	1	1	1	1	1	1.98196	1.96888	2.30428	2.35467	1.7886	45.8269	71.4702	3	1	587.898	8	22	6.29207	37.1618	2.75	1
51	58	15	7	10	32	1	33	0.489495	0.996	0.996	1	0.996	1	0.996	1	1	1	0.211104	0.168579	0.0425256	1	0	1.23452	1.23629	1.20799	1.28723	1.2263	1.23847	1	1	1	1	1	1.23452	1.23629	1.20799	1.28723	1.2263	37.7463	56.3145	0	0	230.675	10	25	6.93975	16.1002	1.5	0
65	64	8	13	5	26	1	80	0.427495	1	1	1	1	1	1	1	1	1	0.215146	0.171681	0.043465	1	0	1.41449	1.46496	1.30477	1.40977	1.2273	1.36426	1	1	1	1	1	1.41449	1.46496	1.30477	1.40977	1.2273	28.9482	43.4654	0	2	487.806	8	18	10.3955	20.5599	3.375	0
44	49	20	29	24	73	1	80	0.528247	1	1	1	1	1	1	1	1	1	0.217043	0.173502	0.0435416	0.967742	0.0322581	1.28346	1.34706	1.47587	1.31548	1.24383	1.33314	0.928571	1	0.857143	1	1	1.29016	1.34706	1.45375	1.31548	1.24383	39.3154	50.616	0	0	254.865	10	29	7.731	17.7395	2.2	0
54	56	18	13	17	48	0.9875	79	0.393227	0.916	0.916	0.972	0.944	0.948	0.968	0.976	0.972	0.996	0.194789	0.150954	0.0438355	1	0	1.73415	1.47037	1.56403	1.38032	1.63985	1.55774	1	1	1	1	1	1.73415	1.47037	1.56403	1.38032	1.63985	43.0293	67.8954	0	2	333.758	10	27	12.5953	19.9825	1.5	1
39	45	14	14	12	40	1	78	0.633241	0.992	0.992	1	0.992	0.996	0.996	1	0.996	1	0.285814	0.226152	0.0596619	1	0	1.91798	2.58877	1.88379	1.80188	1.67691	1.97386	1	1	1	1	1	1.91798	2.58877	1.88379	1.80188	1.67691	43.7922	71.7266	0	2	451.975	10	30	8.5378	36.6231	4.5	3
71	51	13	18	11	42	1	80	0.492114	0.992	0.992	0.996	0.996	0.992	1	0.996	0.996	1	0.214311	0.169251	0.0450599	1	0	1.74159	1.56423	1.63924	1.49319	1.59222	1.60609	1	1	1	1	1	1.74159	1.56423	1.63924	1.49319	1.59222	45.657	59.2097	0	0	488.064	10	21	14.8823	33.9091	2.4	2
63	52	6	4	24	34	1	80	0.492328	1	1	1	1	1	1	1	1	1	0.209836	0.165637	0.0441997	0.983871	0.016129	1.32415	1.56794	1.31538	1.29255	1.32147	1.3643	1	0.928571	1	1	1	1.32415	1.57482	1.31538	1.29255	1.32147	39.8655	57.2801	2	2	368.887	10	27	19.5764	17.2956	0.6	0
59	58	12	5	14	31	0.9875	79	0.460403	0.992	0.992	1	0.992	1	0.992	1	1	1	0.207419	0.164354	0.0430652	1	0	1.56719	1.68124	1.79645	1.5591	1.54986	1.63077	1	1	1	1	1	1.56719	1.68124	1.79645	1.5591	1.54986	48.3923	74.3345	0	3	373.483	10	30	10.1641	27.1673	1.4	3
50	44	12	3	16	31	0.9625	77	0.419791	1	1	1	1	1	1	1	1	1	0.189188	0.149567	0.0396206	0.983871	0.016129	1.29228	1.3028	1.35762	1.36197	1.23068	1.30907	1	1	1	0.928571	1	1.29228	1.3028	1.35762	1.39355	1.23068	33.202	59.951	0	0	301.031	10	30	9.96097	20.1171	1.3	1
56	54	12	9	21	42	1	79	0.47307	0.348	0.348	0.656	0.692	0.672	0.676	0.732	0.94	0.924	0.233906	0.199031	0.0348756	1	0	1.58716	1.82907	1.47629	1.9431	1.57387	1.6819	1	1	1	1	1	1.58716	1.82907	1.47629	1.9431	1.57387	54.2031	59.1978	0	0	809.274	8	19	24.8279	46.3004	1.25	5
53	51	14	17	15	46	1	75	0.522305	0.992	0.992	1	0.992	0.996	0.996	1	0.996	1	0.222769	0.174165	0.0486039	0.967742	0.0322581	1.02351	1.08588	1.03524	1.24109	1.23118	1.12338	1	1	0.923077	1	0.928571	1.02351	1.08588	1.03064	1.24109	1.25742	40.994	42.7288	2	1	324.732	10	26	3.89159	28.5654	4.7	2
63	51	8	8	13	29	1	80	0.414282	1	1	1	1	1	1	1	1	1	0.180837	0.144235	0.0366016	1	0	1.46624	1.41967	1.27561	1.5647	1.36766	1.41878	1	1	1	1	1	1.46624	1.41967	1.27561	1.5647	1.36766	46.9417	46.7217	0	0	239.778	10	29	11.7233	12.2281	0.4	0
49	51	16	7	19	42	0.987342	78	0.51332	0.988	0.988	0.996	0.992	0.992	0.996	0.996	0.996	1	0.195054	0.156053	0.0390002	1	0	1.58794	1.36873	1.28377	1.3085	1.35739	1.38126	1	1	1	1	1	1.58794	1.36873	1.28377	1.3085	1.35739	36.8993	57.1138	0	0	330.044	10	30	5.08012	27.9034	4	2
46	57	18	20	35	73	1	80	0.435153	0.98	0.98	1	0.98	0.992	0.988	1	0.992	1	0.215525	0.170855	0.0446708	1	0	1.28099	1.36503	1.47212	1.4906	1.3029	1.38233	1	1	1	1	1	1.28099	1.36503	1.47212	1.4906	1.3029	52.7544	92.3726	0	0	505.498	9	27	9.59488	28.3231	1.77778	2
57	55	8	8	10	26	1	80	0.459563	0.996	0.996	1	0.996	1	0.996	1	1	1	0.205637	0.16274	0.0428974	1	0	1.20198	1.07856	1.08438	1.09413	1.16261	1.12433	1	1	1	1	1	1.20198	1.07856	1.08438	1.09413	1.16261	39.9201	58.5471	0	1	311.513	10	26	10.1254	21.0089	2.4	1
64	54	9	14	14	37	1	80	0.503264	0.992	0.992	1	0.992	0.992	1	1	0.992	1	0.192034	0.153214	0.0388202	0.983871	0.016129	1.24361	1.3748	1.30736	1.26681	1.27753	1.29402	1	0.923077	1	1	1	1.24361	1.37621	1.30736	1.26681	1.27753	32.0074	35.1454	0	0	256.609	10	28	13.6334	12.0097	0.7	0
60	58	11	19	14	44	1	80	0.429085	0.992	0.992	1	0.992	0.996	0.996	1	0.996	1	0.193334	0.154578	0.0387554	0.983871	0.016129	1.38301	1.55113	1.60414	1.268	1.25965	1.41319	1	1	1	0.923077	1	1.38301	1.55113	1.60414	1.27142	1.25965	40.8779	61.0334	0	3	261.607	10	29	9.641	16.5019	0.7	0
56	51	11	19	15	45	0.987342	78	0.501518	0.992	0.992	1	0.992	0.996	0.996	1	0.996	1	0.237822	0.1901	0.0477216	0.983871	0.016129	1.25178	1.31086	1.22816	1.10444	1.20036	1.21912	1	1	1	0.928571	1	1.25178	1.31086	1.22816	1.08488	1.20036	45.2669	70.4424	0	0	408.307	9	25	16.1569	15.8606	0.777778	0
50	63	8	7	14	29	0.974684	77	0.452146	0.992	0.992	1	0.992	0.996	0.996	1	0.996	1	0.200809	0.160112	0.0406962	1	0	1.12325	1.18137	1.31935	1.21712	1.21511	1.21124	1	1	1	1	1	1.12325	1.18137	1.31935	1.21712	1.21511	38.8862	49.041	1	1	193.131	10	29	6.29435	12.9869	0.6	0
65	57	10	18	18	46	0.9875	79	0.478298	0.812	0.812	0.976	0.836	0.944	0.868	0.984	0.96	0.992	0.209279	0.161107	0.0481718	0.983871	0.016129	1.29776	1.12069	1.1815	1.10915	1.40717	1.22325	1	1	0.923077	1	1	1.29776	1.12069	1.19529	1.10915	1.40717	32.3827	46.9211	0	0	210.05	10	30	6.07176	14.9166	1.8	0
59	59	12	20	18	50	0.975	78	0.396453	0.96	0.96	1	0.96	0.992	0.968	1	0.992	1	0.198297	0.158768	0.0395294	0.983871	0.016129	1.55252	1.59315	1.15987	1.3673	1.4044	1.41545	1	0.888889	1	1	1	1.55252	1.65073	1.15987	1.3673	1.4044	32.1763	53.0967	0	0	477.117	10	26	15.9256	31.7268	2.8	3
48	56	14	19	16	49	1	80	0.369737	0.992	0.992	1	0.992	0.996	0.996	1	0.996	1	0.180548	0.144024	0.0365246	1	0	1.14987	1.1369	1.13555	1.07369	1.17549	1.1343	1	1	1	1	1	1.14987	1.1369	1.13555	1.07369	1.17549	27.616	59.4036	0	7	417.663	9	24	10.078	22.9775	1.66667	2
64	68	9	12	10	31	0.9875	79	0.470003	0.992	0.992	1	0.992	1	0.992	1	1	1	0.204712	0.162474	0.0422383	1	0	1.45292	1.35662	1.56995	1.3599	1.25769	1.39941	1	1	1	1	1	1.45292	1.35662	1.56995	1.3599	1.25769	35.3665	56.8635	0	0	399.333	9	26	16.1949	14.824	0.222222	1
53	46	15	18	24	57	0.9875	79	0.393425	0.988	0.988	1	0.988	0.996	0.992	1	0.996	1	0.16577	0.13186	0.0339108	1	0	1.41992	1.65692	1.37445	2.81909	1.3717	1.72842	1	1	1	1	1	1.41992	1.65692	1.37445	2.81909	1.3717	34.2266	63.2334	0	1	306.221	10	26	13.2741	17.3307	1.2	1
53	48	19	25	8	52	1	80	0.44573	0.98	0.98	1	0.98	0.996	0.984	1	0.996	1	0.216678	0.172269	0.0444087	1	0	1.86589	2.09055	1.94662	1.82288	1.97177	1.93954	1	1	1	1	1	1.86589	2.09055	1.94662	1.82288	1.97177	58.7916	65.28	0	0	426.86	9	25	7.88207	26.1946	2.44444	1
42	55	11	10	8	29	0.9625	77	0.48206	1	1	1	1	1	1	1	1	1	0.22312	0.17805	0.0450703	1	0	1.27319	1.36438	1.18521	1.21156	1.15349	1.23757	1	1	1	1	1	1.27319	1.36438	1.18521	1.21156	1.15349	33.6628	50.6223	0	4	330.177	10	28	15.8205	17.1645	0.5	0
58	59	18	17	11	46	0.949367	75	0.47171	0.96	0.96	0.992	0.968	0.976	0.984	0.992	0.984	1	0.221138	0.175412	0.0457265	1	0	1.47419	1.51794	1.44443	1.28377	1.36983	1.41803	1	1	1	1	1	1.47419	1.51794	1.44443	1.28377	1.36983	29.9103	42.1668	0	0	271.17	10	26	6.63157	20.4659	2.3	0
49	40	13	16	23	52	0.987342	78	0.466942	0.98	0.98	0.98	1	0.992	0.988	0.992	1	0.988	0.174033	0.141984	0.0320483	0.983871	0.016129	1.366	1.38643	1.47023	1.32098	1.26833	1.36239	0.923077	1	1	1	1	1.36744	1.38643	1.47023	1.32098	1.26833	37.729	59.2133	0	0	309.331	10	24	11.3569	19.5611	2.6	1
64	56	15	14	9	38	0.9875	79	0.392285	0.992	0.992	1	0.992	0.996	0.996	1	0.996	1	0.193916	0.154239	0.039677	0.983871	0.016129	1.09225	1.10272	1.27948	1.21289	1.14002	1.16547	1	0.909091	1	1	1	1.09225	1.10288	1.27948	1.21289	1.14002	34.8462	56.3311	0	3	235.36	10	25	8.15617	15.3642	0.8	0
60	52	9	7	13	29	1	80	0.503827	0.976	0.976	1	0.976	0.988	0.988	1	0.988	1	0.235068	0.185412	0.0496552	1	0	1.17666	1.22411	1.18154	1.22477	1.33638	1.22869	1	1	1	1	1	1.17666	1.22411	1.18154	1.22477	1.33638	30.7622	33.4149	0	0	362.42	10	29	9.58987	26.6099	3.5	2
45	53	20	24	12	56	0.9875	79	0.398181	0.02	0.02	0.52	0.5	0.516	0.504	0.616	0.9	0.904	0.289917	0.226611	0.0633057	1	0	1.10445	1.05176	0.984375	0.991272	1.04883	1.03614	1	1	1	1	1	1.10445	1.05176	0.984375	0.991272	1.04883	34.667	53.2465	0	4	439.219	10	20	18.4763	25.4287	1.6	1
52	58	17	19	13	49	1	80	0.438104	1	1	1	1	1	1	1	1	1	0.188954	0.150922	0.0380316	1	0	1.43629	1.34932	1.26103	1.46022	1.32799	1.36697	1	1	1	1	1	1.43629	1.34932	1.26103	1.46022	1.32799	31.5735	48.3057	0	0	374.682	10	25	13.4849	23.9618	1.5	1
54	60	15	10	14	39	0.975	78	0.413423	0.996	0.996	1	0.996	0.996	1	1	0.996	1	0.176162	0.139929	0.0362336	0.935484	0.0645161	1.19457	1.2298	1.24433	1.23062	1.25843	1.23155	0.666667	1	1	1	0.846154	1.26548	1.2298	1.24433	1.23062	1.29421	28.7595	32.4473	1	0	181.456	10	25	3.71752	14.4107	2	0
51	59	16	12	26	54	1	79	0.496261	0.988	0.988	0.996	0.992	0.996	0.992	0.996	1	1	0.244121	0.193604	0.0505167	1	0	1.75885	1.72562	1.69045	1.82025	1.75977	1.75099	1	1	1	1	1	1.75885	1.72562	1.69045	1.82025	1.75977	39.26	119.97	0	0	354.55	10	30	7.76936	27.6299	1.4	1
50	58	13	21	15	49	1	80	0.469403	0.972	0.972	0.992	0.98	0.984	0.988	0.992	0.992	1	0.211953	0.168374	0.0435796	1	0	1.38872	1.33274	1.33257	1.39593	1.29507	1.34901	1	1	1	1	1	1.38872	1.33274	1.33257	1.39593	1.29507	31.6257	31.2908	1	0	376.538	10	28	13.1921	24.4264	1.1	3
56	59	9	17	8	34	0.974684	77	0.430252	0.988	0.988	0.988	1	0.988	1	0.988	1	1	0.202232	0.162779	0.0394531	0.967742	0.0322581	1.21529	0.956565	1.15879	1.19123	1.27447	1.15927	1	1	0.909091	0.923077	1	1.21529	0.956565	1.10856	1.18413	1.27447	33.3268	56.5342	0	0	276.312	10	27	13.6907	13.9231	0.9	1
52	65	11	20	16	47	1	80	0.484473	0.984	0.984	1	0.984	1	0.984	1	1	1	0.230783	0.180877	0.0499059	1	0	1.30027	1.3565	1.20708	1.29882	1.26669	1.28587	1	1	1	1	1	1.30027	1.3565	1.20708	1.29882	1.26669	39.2358	68.6196	3	4	322.327	10	27	8.69038	23.5248	3.1	1
57	51	7	5	8	20	1	80	0.652524	0.992	0.992	1	0.992	0.996	0.996	1	0.996	1	0.248644	0.198415	0.050229	0.983871	0.016129	1.701	1.47408	1.65666	1.6145	1.72607	1.63446	1	0.916667	1	1	1	1.701	1.46879	1.65666	1.6145	1.72607	46.4941	63.6318	0	0	354.188	9	26	10.0346	15.9666	0.444444	1
42	46	13	8	15	36	1	79	0.518339	0.968	0.968	0.984	0.984	0.984	0.984	0.988	0.996	0.996	0.214541	0.170551	0.0439897	0.967742	0.0322581	0.972595	0.958468	1.12292	0.935359	0.94962	0.987793	0.916667	1	1	0.923077	1	0.958674	0.958468	1.12292	0.934865	0.94962	31.4492	43.2022	0	0	344.656	10	27	14.6419	19.8053	1.5	1
52	57	13	14	16	43	0.975	78	0.420992	0.992	0.992	0.996	0.996	0.992	1	0.996	0.996	1	0.194025	0.153323	0.0407021	1	0	1.50994	1.59414	1.42627	1.4282	1.46591	1.48489	1	1	1	1	1	1.50994	1.59414	1.42627	1.4282	1.46591	43.7539	61.1409	1	0	386.479	10	27	9.27722	29.3539	1.3	1
74	69	12	5	14	31	1	80	0.499847	0.788	0.788	1	0.788	0.964	0.824	1	0.964	1	0.22656	0.181688	0.0448723	0.983871	0.016129	1.22128	1.19462	1.13096	1.27987	1.55409	1.27617	1	1	1	0.833333	1	1.22128	1.19462	1.13096	1.19648	1.55409	28.3591	45.0842	0	0	202.981	10	27	6.3884	13.891	1.3	0
73	68	7	7	11	25	1	80	0.417279	1	1	1	1	1	1	1	1	1	0.166181	0.133017	0.0331641	1	0	1.101	1.06806	1.30474	1.02922	1.13323	1.12725	1	1	1	1	1	1.101	1.06806	1.30474	1.02922	1.13323	36.7967	68.0531	0	0	210.108	10	30	8.89451	12.0921	2	0
64	62	11	12	10	33	1	80	0.453157	1	1	1	1	1	1	1	1	1	0.223037	0.176665	0.0463721	1	0	1.12525	1.06097	1.05119	1.06653	1.17934	1.09665	1	1	1	1	1	1.12525	1.06097	1.05119	1.06653	1.17934	27.4358	37.061	0	0	203.638	10	29	5.99445	14.3528	1.6	0
61	44	16	18	25	59	0.975	78	0.381053	0.984	0.984	1	0.984	0.996	0.988	1	0.996	1	0.186121	0.147913	0.0382085	1	0	0.900923	1.28865	1.10122	1.01968	1.27647	1.11739	1	1	1	1	1	0.900923	1.28865	1.10122	1.01968	1.27647	31.0857	40.8875	0	0	223.73	10	29	6.2992	16.0723	2.5	1
51	50	16	28	22	66	1	36	0.576931	0.988	0.988	0.996	0.992	0.988	1	0.996	0.992	1	0.213228	0.168027	0.0452018	1	0	1.32506	1.20634	1.28432	1.17931	1.26687	1.25238	1	1	1	1	1	1.32506	1.20634	1.28432	1.17931	1.26687	31.6816	43.8196	0	0	218.204	10	30	12.698	9.09585	0.1	0
70	62	16	13	13	42	1	77	0.556481	0.996	0.996	1	0.996	0.996	1	1	0.996	1	0.205278	0.162833	0.0424447	1	0	1.65745	1.75852	1.5911	1.89743	1.79552	1.74	1	1	1	1	1	1.65745	1.75852	1.5911	1.89743	1.79552	28.5758	55.8128	0	0	357.369	9	27	12.3237	14.0281	1	0
65	66	12	16	11	39	1	80	0.485773	0.992	0.992	1	0.992	1	0.992	1	1	1	0.203956	0.161328	0.0426281	0.983871	0.016129	1.39807	1.34255	1.45002	1.47837	1.22461	1.37872	1	1	1	0.9	1	1.39807	1.34255	1.45002	1.27968	1.22461	31.1792	55.3252	1	6	269.608	10	24	5.88905	21.0546	2.4	0
59	54	16	12	21	49	1	41	0.505106	0.98	0.98	1	0.98	0.996	0.984	1	0.996	1	0.232483	0.186557	0.0459258	1	0	1.76039	1.79205	1.83503	1.80888	1.49394	1.73806	1	1	1	1	1	1.76039	1.79205	1.83503	1.80888	1.49394	40.5582	62.7291	0	1	412.892	10	27	16.6394	24.6182	0.9	1
58	67	22	27	22	71	1	78	0.507428	0.992	0.992	0.996	0.996	0.996	0.996	0.996	1	1	0.210205	0.167122	0.0430829	1	0	1.0345	1.17458	1.00184	1.34662	1.05422	1.12235	1	1	1	1	1	1.0345	1.17458	1.00184	1.34662	1.05422	46.7083	41.5112	3	0	270.118	10	27	5.79753	21.1971	1.8	1
62	56	14	13	18	45	1	80	0.475833	0.98	0.98	0.988	0.992	0.988	0.992	0.988	1	1	0.200787	0.158679	0.0421083	1	0	1.20654	1.14502	1.21254	1.1802	1.03731	1.15632	1	1	1	1	1	1.20654	1.14502	1.21254	1.1802	1.03731	23.4689	32.0885	0	0	283.38	10	25	12.1701	16.1508	0.9	1
55	52	18	22	23	63	1	80	0.435934	0.012	0.012	0.504	0.508	0.504	0.508	0.604	0.9	0.9	0.112834	0.112834	0	1	0	1.03853	1.25136	1.17107	1.27693	1.27073	1.20172	1	1	1	1	1	1.03853	1.25136	1.17107	1.27693	1.27073	36.8208	64.0316	0	1	357.192	10	23	10.8779	24.811	2.6	3
52	53	15	15	14	44	0.974684	77	0.422167	0.852	0.852	0.852	1	0.872	0.98	0.872	1	0.98	0.165085	0.126698	0.0383872	1	0	1.36016	1.63643	1.46735	1.13249	1.25741	1.37077	1	1	1	1	1	1.36016	1.63643	1.46735	1.13249	1.25741	32.7061	36.5186	0	0	738.652	10	26	12.2344	28.293	2.5	3
58	61	15	14	17	46	0.987013	76	0.615552	0.992	0.992	0.996	0.996	0.996	0.996	0.996	1	1	0.228896	0.180462	0.0484335	1	0	1.80961	1.66965	1.8205	1.95938	1.95613	1.84305	1	1	1	1	1	1.80961	1.66965	1.8205	1.95938	1.95613	42.9136	80.1709	0	0	541.92	9	24	10.4767	36.3808	4	2
58	60	14	12	9	35	1	44	0.537392	0.996	0.996	0.996	1	0.996	1	0.996	1	1	0.234764	0.183745	0.0510195	1	0	1.45947	1.33372	1.30576	1.34362	1.53252	1.39502	1	1	1	1	1	1.45947	1.33372	1.30576	1.34362	1.53252	34.0269	53.8663	0	2	376.75	10	30	16.6722	20.9852	2.2	1
65	61	15	20	16	51	1	80	0.45546	1	1	1	1	1	1	1	1	1	0.197843	0.158404	0.0394388	1	0	1.31975	1.20409	1.44128	1.39293	1.15103	1.30182	1	1	1	1	1	1.31975	1.20409	1.44128	1.39293	1.15103	31.6492	39.8298	0	0	336.955	10	25	8.79184	24.863	2.9	2
50	55	19	16	19	54	1	80	0.474966	0.996	0.996	1	0.996	0.996	1	1	0.996	1	0.199526	0.15856	0.0409656	0.983871	0.016129	1.13097	0.996741	1.01026	1.04096	1.25495	1.08678	1	1	0.909091	1	1	1.13097	0.996741	1.01131	1.04096	1.25495	33.4702	37.6913	1	0	390.011	10	30	29.9864	8.99837	0	2
56	52	13	16	9	38	0.987342	78	0.529893	1	1	1	1	1	1	1	1	1	0.215673	0.171618	0.0440547	1	0	1.22161	1.03309	1.20418	1.12604	1.12388	1.14176	1	1	1	1	1	1.22161	1.03309	1.20418	1.12604	1.12388	32.3656	42.9108	0	0	222.665	10	27	7.89499	14.3547	0.9	0
60	57	15	11	13	39	0.9875	79	0.545855	0.996	0.996	1	0.996	1	0.996	1	1	1	0.217727	0.174062	0.043665	0.983871	0.016129	1.89596	1.80018	1.49137	1.63976	1.95295	1.75605	1	1	1	1	0.944444	1.89596	1.80018	1.49137	1.63976	1.90168	50.7744	78.7737	0	1	404.79	10	26	15.9381	24.4865	1.9	3
62	56	21	13	15	49	1	80	0.501478	0.988	0.988	1	0.988	0.996	0.992	1	0.996	1	0.205124	0.16325	0.0418736	0.983871	0.016129	1.66054	1.8167	1.71685	1.78038	1.72156	1.7392	1	1	1	0.916667	1	1.66054	1.8167	1.71685	1.79494	1.72156	45.415	48.3887	0	0	590.604	8	22	14.6615	29.1442	2.5	1
56	54	15	15	22	52	1	80	0.379675	1	1	1	1	1	1	1	1	1	0.196567	0.153895	0.0426725	0.983871	0.016129	1.08458	1.22979	1.22285	0.996714	0.988723	1.10453	0.9	1	1	1	1	1.11819	1.22979	1.22285	0.996714	0.988723	31.2671	37.8022	0	1	199.927	10	29	10.2033	9.77204	0.2	0
54	45	21	18	14	53	1	80	0.367899	0.992	0.992	1	0.992	0.996	0.996	1	0.996	1	0.175544	0.139977	0.0355671	1	0	0.996264	0.996826	0.979004	1.15457	0.915228	1.00838	1	1	1	1	1	0.996264	0.996826	0.979004	1.15457	0.915228	28.7717	34.6562	0	2	314.544	10	28	10.7372	20.7011	3.3	1
57	59	9	12	5	26	0.52381	11	0.127353	0.968	0.968	0.992	0.976	0.984	0.984	0.992	0.992	1	0.195908	0.154076	0.0418323	0.967742	0.0322581	1.00972	1.067	1.00366	0.938965	1.00042	1.00395	0.818182	1	1	1	1	1.01948	1.067	1.00366	0.938965	1.00042	35.0673	55.7185	0	1	282.344	10	26	8.86158	19.3556	1.4	1
42	55	19	12	19	50	1	80	0.414668	1	1	1	1	1	1	1	1	1	0.206193	0.165105	0.0410874	1	0	0.841492	0.849333	0.856266	0.917088	1.05671	0.904179	1	1	1	1	1	0.841492	0.849333	0.856266	0.917088	1.05671	34.3757	46.5996	0	0	385.87	10	24	14.5599	24.0101	1.4	2
56	58	13	7	15	35	0.9875	79	0.396469	0.988048	0.988048	0.996016	0.992032	0.992032	0.996016	0.996016	0.996016	1	0.181747	0.14399	0.0377576	1	0	1.23232	1.22734	1.21059	1.20618	1.12635	1.20056	1	1	1	1	1	1.23232	1.22734	1.21059	1.20618	1.12635	30.0116	55.3468	0	2	515.165	9	27	26.8211	17.0672	0.444444	2
55	39	16	24	14	54	0.973684	74	0.478135	0.988	0.988	1	0.988	0.992	0.996	1	0.992	1	0.211872	0.170568	0.0413038	1	0	1.31012	1.09638	1.21671	1.36326	1.22936	1.24317	1	1	1	1	1	1.31012	1.09638	1.21671	1.36326	1.22936	45.2418	52.3782	0	0	303.781	10	26	7.80201	22.3859	4.3	1
58	55	11	7	24	42	1	80	0.461517	1	1	1	1	1	1	1	1	1	0.202244	0.162168	0.0400766	1	0	1.39875	1.63716	1.63532	1.56226	1.62359	1.57142	1	1	1	1	1	1.39875	1.63716	1.63532	1.56226	1.62359	45.6388	80.0378	0	1	289.305	10	30	9.23564	19.6773	1	0
55	52	18	15	24	57	1	80	0.463464	1	1	1	1	1	1	1	1	1	0.199232	0.160604	0.0386289	1	0	1.79792	1.78273	1.99185	1.8258	1.9959	1.87884	1	1	1	1	1	1.79792	1.78273	1.99185	1.8258	1.9959	40.5522	49.6067	0	0	272.163	10	29	12.0496	15.1501	0.4	0
52	48	14	18	14	46	0.9875	79	0.37843	0.996	0.996	1	0.996	1	0.996	1	1	1	0.177237	0.140581	0.0366552	1	0	1.05249	1.1177	0.990927	1.27401	1.19163	1.12535	1	1	1	1	1	1.05249	1.1177	0.990927	1.27401	1.19163	38.2473	45.4232	1	0	244.61	10	27	9.23578	15.2081	1.5	1
50	43	14	14	24	52	0.925	74	0.484368	0.988	0.988	1	0.988	1	0.988	1	1	1	0.208031	0.164164	0.0438672	1	0	1.08406	0.886586	0.90152	1.10046	0.947243	0.983972	1	1	1	1	1	1.08406	0.886586	0.90152	1.10046	0.947243	33.8446	56.1119	0	1	310.403	10	26	6.91288	24.1071	3	1
64	58	14	14	16	44	1	80	0.488458	1	1	1	1	1	1	1	1	1	0.19061	0.151758	0.0388525	1	0	1.11125	1.20155	1.14085	1.08472	1.01215	1.1101	1	1	1	1	1	1.11125	1.20155	1.14085	1.08472	1.01215	33.9824	44.8174	0	0	308.389	10	25	9.03626	21.4441	1.5	1
77	70	9	10	15	34	1	80	0.47081	1	1	1	1	1	1	1	1	1	0.217373	0.173391	0.0439824	1	0	1.51735	1.42215	1.4102	1.4387	1.4389	1.44546	1	1	1	1	1	1.51735	1.42215	1.4102	1.4387	1.4389	52.5713	54.1089	0	0	237.091	10	28	6.53923	17.1505	0.4	0
50	55	14	5	14	33	1	80	0.458315	0.992	0.992	1	0.992	0.996	0.996	1	0.996	1	0.205973	0.164921	0.0410524	1	0	1.44264	1.37763	1.45416	1.69968	1.40682	1.47619	1	1	1	1	1	1.44264	1.37763	1.45416	1.69968	1.40682	37.9675	49.4295	0	1	259.27	10	28	8.37848	17.5228	0.7	0
59	63	10	15	13	38	1	80	0.429882	0.984	0.984	1	0.984	1	0.984	1	1	1	0.199335	0.159212	0.040123	1	0	0.993207	1.19195	1.16949	1.04716	0.980074	1.07637	1	1	1	1	1	0.993207	1.19195	1.16949	1.04716	0.980074	33.8324	44.5846	0	2	282.828	10	25	7.69558	20.5705	1.9	1
55	50	11	15	20	46	0.575758	19	0.155155	0.96	0.96	1	0.96	0.98	0.98	1	0.98	1	0.164243	0.130262	0.0339813	0.967742	0.0322581	1.26577	1.22825	1.29539	1.18423	1.10498	1.21572	1	1	1	0.923077	0.923077	1.26577	1.22825	1.29539	1.20811	1.09391	47.1083	55.9388	1	1	216.364	10	28	4.873	16.743	2.4	0
55	45	17	8	15	40	0.9875	79	0.411084	0.052	0.052	0.52	0.532	0.52	0.532	0.612	0.908	0.908	0.130934	0.0795898	0.0513446	1	0	1.06241	1.10482	1.07777	1.06852	1.05147	1.073	1	1	1	1	1	1.06241	1.10482	1.07777	1.06852	1.05147	22.1101	36.6997	0	1	290.341	10	22	5.63065	22.1908	2.9	2
60	37	9	9	13	31	0.9875	79	0.449388	0.98	0.98	1	0.98	1	0.98	1	1	1	0.216477	0.172561	0.0439164	1	0	1.68323	1.44839	1.47267	1.4582	1.46583	1.50566	1	1	1	1	1	1.68323	1.44839	1.47267	1.4582	1.46583	39.9567	64.6081	0	1	254.778	10	25	7.14669	18.3137	1.2	1
45	65	12	22	12	46	0.9875	79	0.462205	0.984	0.984	1	0.984	1	0.984	1	1	1	0.214891	0.17026	0.0446311	0.983871	0.016129	1.23662	1.28002	1.1723	1.25383	1.23811	1.23618	0.916667	1	1	1	1	1.24653	1.28002	1.1723	1.25383	1.23811	29.3018	42.2989	0	0	199.591	10	25	5.07404	14.868	1.1	0
47	48	25	12	20	57	0.9875	79	0.38832	1	1	1	1	1	1	1	1	1	0.207617	0.163916	0.0437012	1	0	1.24291	1.50223	1.32872	1.51654	1.32261	1.3826	1	1	1	1	1	1.24291	1.50223	1.32872	1.51654	1.32261	65.1677	71.4366	2	0	313.043	10	25	7.76289	23.5243	3.1	1
48	45	17	11	23	51	1	79	0.503953	0.984	0.984	1	0.984	1	0.984	1	1	1	0.20623	0.164859	0.0413709	1	0	1.35114	1.67243	1.65983	1.66113	1.41642	1.55219	1	1	1	1	1	1.35114	1.67243	1.65983	1.66113	1.41642	37.1108	41.3147	0	0	413.251	10	27	7.60645	33.7018	4.7	2
52	53	18	9	10	37	1	80	0.5231	0.996	0.996	0.996	1	1	0.996	1	1	0.996	0.228117	0.182441	0.0456754	1	0	1.63232	1.69472	1.62357	1.63435	1.5267	1.62233	1	1	1	1	1	1.63232	1.69472	1.62357	1.63435	1.5267	43.1655	56.8171	3	0	645.575	9	24	26.8631	31.5169	0.888889	4
43	43	12	7	21	40	0.975	78	0.489089	0.996	0.996	1	0.996	1	0.996	1	1	1	0.206019	0.163071	0.0429482	1	0	1.48911	1.43989	1.51447	1.6085	1.55158	1.52071	1	1	1	1	1	1.48911	1.43989	1.51447	1.6085	1.55158	42.0347	47.106	0	0	376.348	10	28	16.1441	21.4731	0.9	2
49	53	22	18	15	55	0.9875	79	0.477199	0.984	0.984	1	0.984	0.992	0.992	1	0.992	1	0.194526	0.154684	0.0398421	1	0	1.28786	1.11152	1.12259	0.923285	1.12774	1.1146	1	1	1	1	1	1.28786	1.11152	1.12259	0.923285	1.12774	27.8981	37.6668	0	0	188.673	10	24	4.27974	14.5699	2	0
62	61	14	4	13	31	0.975	78	0.485258	0.984	0.984	0.992	0.992	0.988	0.996	0.992	0.996	1	0.20522	0.163869	0.0413506	1	0	1.29034	1.54187	1.26864	1.36385	1.30876	1.35469	1	1	1	1	1	1.29034	1.54187	1.26864	1.36385	1.30876	44.4077	48.5264	0	3	394.291	10	24	8.18569	31.2273	2.3	2
64	65	15	6	15	36	0.972973	36	0.533162	0.992	0.992	0.996	0.996	0.992	1	0.996	0.996	1	0.208189	0.165737	0.0424519	0.983871	0.016129	1.39709	1.2489	1.28168	1.28764	1.48916	1.3409	1	0.928571	1	1	1	1.39709	1.27224	1.28168	1.28764	1.48916	53.5908	77.5337	0	0	332.28	10	22	6.93832	26.2729	2.5	2
58	64	9	11	14	34	1	76	0.601863	0.98	0.98	0.996	0.984	0.992	0.988	0.996	0.996	1	0.232325	0.185639	0.0466867	1	0	1.65595	1.8844	1.73398	2.01871	1.80367	1.81934	1	1	1	1	1	1.65595	1.8844	1.73398	2.01871	1.80367	52.2019	52.9048	0	1	537.603	8	22	8.45217	28.7314	3.625	1
68	59	16	24	13	53	0.987342	78	0.438043	0.972	0.972	1	0.972	0.988	0.984	1	0.988	1	0.205729	0.164019	0.04171	1	0	1.30472	1.17972	1.25109	1.11256	1.31358	1.23233	1	1	1	1	1	1.30472	1.17972	1.25109	1.11256	1.31358	36.1958	66.0796	0	3	248.561	10	29	5.13668	19.6973	1.9	0
69	64	10	13	9	32	0.9875	79	0.479013	0.996	0.996	1	0.996	0.996	1	1	0.996	1	0.210706	0.168009	0.0426964	1	0	1.89752	1.66238	1.56783	1.56519	1.7631	1.6912	1	1	1	1	1	1.89752	1.66238	1.56783	1.56519	1.7631	41.8043	61.539	0	0	420.875	10	29	25.2658	16.8035	0.2	2
54	51	6	13	15	34	1	80	0.566346	0.996	0.996	1	0.996	0.996	1	1	0.996	1	0.19219	0.150132	0.0420581	1	0	1.47236	1.48205	1.99248	1.47393	1.39997	1.56416	1	1	1	1	1	1.47236	1.48205	1.99248	1.47393	1.39997	31.6037	39.776	2	0	320.542	10	25	10.0718	21.951	1.6	1
																												#DIV/0!
						0.978978	75.8738	0.473656	0.954685	0.954685	0.981542	0.973144	0.978818	0.975867	0.985329	0.993489	0.996213	0.213091	0.17153	0.0474603	0.993784	0.00621584	1.40506	1.39751	1.40129	1.40204	1.39324	1.39983	0.992646	0.992167	0.99418	0.993235	0.995416	1.40575	1.39688	1.39904	1.40102	1.3937	39.3911	55.1146	0.388704	0.86711	338.356	9.81728	26.2226	10.8112	21.563	1.76079	1.09635
						0.0622753	12.0362	0.0718279	0.162083	0.162083	0.0812605	0.0824355	0.0809355	0.0818746	0.0650943	0.016724	0.0162958	0.0294271	0.0562998	0.0587889	0.0130135	0.0130135	0.275565	0.284646	0.275751	0.309732	0.267718	0.258716	0.0304049	0.0284852	0.0248435	0.023855	0.0203348	0.275843	0.285461	0.274946	0.309894	0.267529	9.24962	14.6124	1.24836	1.72113	119.914	0.49312	2.71667	5.1748	7.17878	1.14293	1.10485
						0.462687	4	0.127353	0.00400001	0.00400001	0.504	0.5	0.5	0.5	0.6	0.9	0.9	0.112834	0	0	0.903226	0	0.841492	0.849333	0.856266	0.872303	0.891027	0.904179	0.666667	0.8	0.8	0.833333	0.846154	0.841492	0.849333	0.856266	0.872303	0.891027	21.8	31.2908	0	0	158.448	7	18	3.71752	8.17951	0	0
						1	80	0.766663	1	1	1	1	1	1	1	1	1	0.409485	0.992	0.992	1	0.0967742	2.49998	2.7438	2.54255	2.81909	2.49908	2.45364	1	1	1	1	1	2.49998	2.7438	2.54255	2.81909	2.49908	91.1526	119.97	13	15	1081.21	10	30	37.9059	48.9682	6.77778	5
																												#DIV/0!
																												#DIV/0!
																												#DIV/0!
																												#DIV/0!
																												#DIV/0!
																												#DIV/0!
																												#DIV/0!
																												#DIV/0!
																												#DIV/0!
																												#DIV/0!
																												#DIV/0!
																												#DIV/0!
																												#DIV/0!
																												#DIV/0!
																												#DIV/0!
																												#DIV/0!
																												#DIV/0!
																												#DIV/0!
																												#DIV/0!
																												#DIV/0!
																												#DIV/0!
																												#DIV/0!
																												#DIV/0!
																												#DIV/0!
																												#DIV/0!
																												#DIV/0!
																												#DIV/0!
																												#DIV/0!
																												#DIV/0!
																												#DIV/0!
																												#DIV/0!
																												#DIV/0!
																												#DIV/0!
																												#DIV/0!
																												#DIV/0!
																												#DIV/0!
																												#DIV/0!
																												#DIV/0!
																												#DIV/0!
																												#DIV/0!
																												#DIV/0!
																												#DIV/0!
																												#DIV/0!
																												#DIV/0!
																												#DIV/0!
																												#DIV/0!
																												#DIV/0!
																												#DIV/0!
																												#DIV/0!
																												#DIV/0!
																												#DIV/0!
																												#DIV/0!
																												#DIV/0!
																												#DIV/0!
																												#DIV/0!
																												#DIV/0!
																												#DIV/0!
																												#DIV/0!
																												#DIV/0!
																												#DIV/0!
																												#DIV/0!
																												#DIV/0!
																												#DIV/0!
																												#DIV/0!
																												#DIV/0!
																												#DIV/0!
																												#DIV/0!
																												#DIV/0!
																												#DIV/0!
																												#DIV/0!
																												#DIV/0!
																												#DIV/0!
																												#DIV/0!
																												#DIV/0!
																												#DIV/0!
																												#DIV/0!
																												#DIV/0!
																												#DIV/0!
																												#DIV/0!
																												#DIV/0!
																												#DIV/0!
																												#DIV/0!
																												#DIV/0!
																												#DIV/0!
																												#DIV/0!
																												#DIV/0!
																												#DIV/0!
																												#DIV/0!
																												#DIV/0!
																												#DIV/0!
																												#DIV/0!
																												#DIV/0!
																												#DIV/0!
																												#DIV/0!
																												#DIV/0!
																												#DIV/0!
																												#DIV/0!
																												#DIV/0!
																												#DIV/0!
																												#DIV/0!
																												#DIV/0!
																												#DIV/0!
																												#DIV/0!
																												#DIV/0!
																												#DIV/0!
																												#DIV/0!
																												#DIV/0!
																												#DIV/0!
																												#DIV/0!
																												#DIV/0!
																												#DIV/0!
																												#DIV/0!
																												#DIV/0!
																												#DIV/0!
																												#DIV/0!
																												#DIV/0!
																												#DIV/0!
																												#DIV/0!
																												#DIV/0!
																												#DIV/0!
																												#DIV/0!
																												#DIV/0!
																												#DIV/0!
																												#DIV/0!
																												#DIV/0!
																												#DIV/0!
																												#DIV/0!
																												#DIV/0!
																												#DIV/0!
																												#DIV/0!
																												#DIV/0!
																												#DIV/0!
																												#DIV/0!
																												#DIV/0!
																												#DIV/0!
																												#DIV/0!
																												#DIV/0!
																												#DIV/0!
																												#DIV/0!
																												#DIV/0!
																												#DIV/0!
																												#DIV/0!
																												#DIV/0!
																												#DIV/0!
																												#DIV/0!
																												#DIV/0!
																												#DIV/0!
																												#DIV/0!
																												#DIV/0!
																												#DIV/0!
																												#DIV/0!
																												#DIV/0!
																												#DIV/0!
																												#DIV/0!
																												#DIV/0!
																												#DIV/0!
																												#DIV/0!
																												#DIV/0!
																												#DIV/0!
																												#DIV/0!
																												#DIV/0!
																												#DIV/0!
																												#DIV/0!
																												#DIV/0!
																												#DIV/0!
																												#DIV/0!
																												#DIV/0!
																												#DIV/0!
																												#DIV/0!
																												#DIV/0!
																												#DIV/0!
																												#DIV/0!
																												#DIV/0!
																												#DIV/0!
																												#DIV/0!
																												#DIV/0!
																												#DIV/0!
																												#DIV/0!
																												#DIV/0!
																												#DIV/0!
																												#DIV/0!
																												#DIV/0!
																												#DIV/0!
																												#DIV/0!
																												#DIV/0!
																												#DIV/0!
																												#DIV/0!
																												#DIV/0!
																												#DIV/0!
																												#DIV/0!
																												#DIV/0!
																												#DIV/0!
																												#DIV/0!
																												#DIV/0!
																												#DIV/0!
																												#DIV/0!
																												#DIV/0!
																												#DIV/0!
																												#DIV/0!
																												#DIV/0!
																												#DIV/0!
																												#DIV/0!
																												#DIV/0!
																												#DIV/0!
																												#DIV/0!
																												#DIV/0!
																												#DIV/0!
																												#DIV/0!
																												#DIV/0!
																												#DIV/0!
																												#DIV/0!
																												#DIV/0!
																												#DIV/0!
																												#DIV/0!
																												#DIV/0!
																												#DIV/0!
																												#DIV/0!
																												#DIV/0!
																												#DIV/0!
																												#DIV/0!
																												#DIV/0!
																												#DIV/0!
																												#DIV/0!
																												#DIV/0!
																												#DIV/0!
																												#DIV/0!
																												#DIV/0!
																												#DIV/0!
																												#DIV/0!
																												#DIV/0!
																												#DIV/0!
																												#DIV/0!
																												#DIV/0!
																												#DIV/0!
																												#DIV/0!
																												#DIV/0!
																												#DIV/0!
																												#DIV/0!
																												#DIV/0!
																												#DIV/0!
																												#DIV/0!
																												#DIV/0!
																												#DIV/0!
																												#DIV/0!
																												#DIV/0!
																												#DIV/0!
																												#DIV/0!
																												#DIV/0!
																												#DIV/0!
																												#DIV/0!
																												#DIV/0!
																												#DIV/0!
																												#DIV/0!
																												#DIV/0!
																												#DIV/0!
																												#DIV/0!
																												#DIV/0!
																												#DIV/0!
																												#DIV/0!
																												#DIV/0!
																												#DIV/0!
																												#DIV/0!
																												#DIV/0!
																												#DIV/0!
																												#DIV/0!
																												#DIV/0!
																												#DIV/0!
																												#DIV/0!
																												#DIV/0!
																												#DIV/0!
																												#DIV/0!
																												#DIV/0!
																												#DIV/0!
																												#DIV/0!
																												#DIV/0!
																												#DIV/0!
																												#DIV/0!
																												#DIV/0!
																												#DIV/0!
																												#DIV/0!
																												#DIV/0!
																												#DIV/0!
																												#DIV/0!
																												#DIV/0!
																												#DIV/0!
																												#DIV/0!
																												#DIV/0!
																												#DIV/0!
																												#DIV/0!
																												#DIV/0!
																												#DIV/0!
																												#DIV/0!
																												#DIV/0!
																												#DIV/0!
																												#DIV/0!
																												#DIV/0!
[truncated: 81 more columns]
